# Supplementary material
Source: PubMed Central journal article supplement (PMC6511942)
Supplement: jm8b01923_si_001.pdf [file jm8b01923_si_001.pdf]

# Supporting Information

## Exploitation of antibiotic resistance as a novel drug target: development of a $\beta$ -lactamase-activated antibacterial prodrug

*Lindsay E. Evans*<sup>\*†,‡</sup>, *Aishwarya Krishna*<sup>†</sup>, *Yajing Ma*<sup>‡</sup>, *Thomas E. Webb*<sup>§</sup>, *Dominic C. Marshall*<sup>§</sup>, *Catherine L. Tooke*<sup>||</sup>, *James Spencer*<sup>||</sup>, *Thomas B. Clarke*<sup>†</sup>, *Alan Armstrong*<sup>‡</sup> and *Andrew M. Edwards*<sup>\*†</sup>

<sup>†</sup> MRC Centre for Molecular Bacteriology and Infection, Imperial College London, SW7 2AZ, United Kingdom.

<sup>‡</sup> Department of Chemistry, Molecular Sciences Research Hub, Imperial College London, W12 0BZ, United Kingdom.

<sup>§</sup> Department of Medicine, Imperial College London, SW7 2AZ, United Kingdom.

<sup>||</sup> School of Cellular and Molecular Medicine, University of Bristol, Biomedical Sciences Building, University Walk, Bristol, BS8 1TD, United Kingdom.

### Table of Contents

|                                                |     |
|------------------------------------------------|-----|
| Fig. S1 – Fig. S4, Table S1                    | S2  |
| Recombinant $\beta$ -lactamase protein         | S4  |
| Bacterial Strains                              | S5  |
| Transformation of <i>E. coli</i> with plasmids | S6  |
| Bacterial cultures                             | S6  |
| Assay procedures                               | S6  |
| NMR Spectra of synthesized compounds           | S10 |

## Additional Data

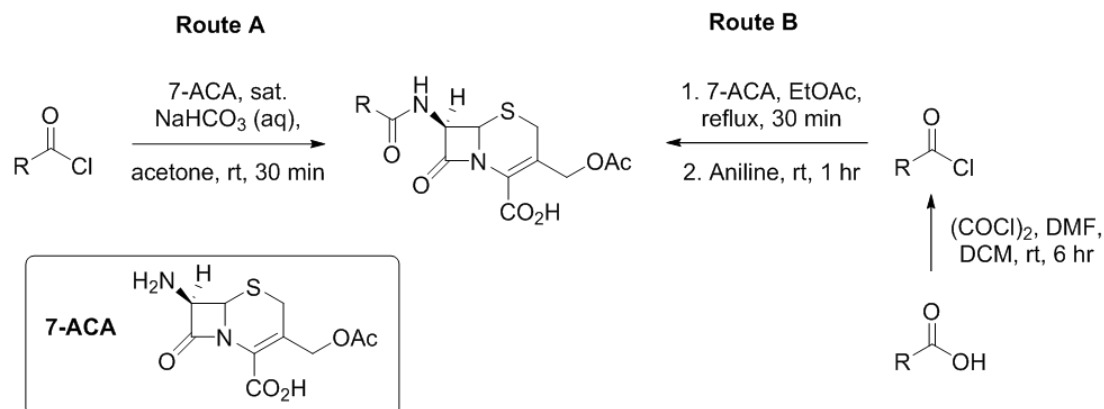

**Figure S1.** Summary of synthetic routes to  $\beta$ -lactam analogues **9** – **25**.<sup>1,2</sup>

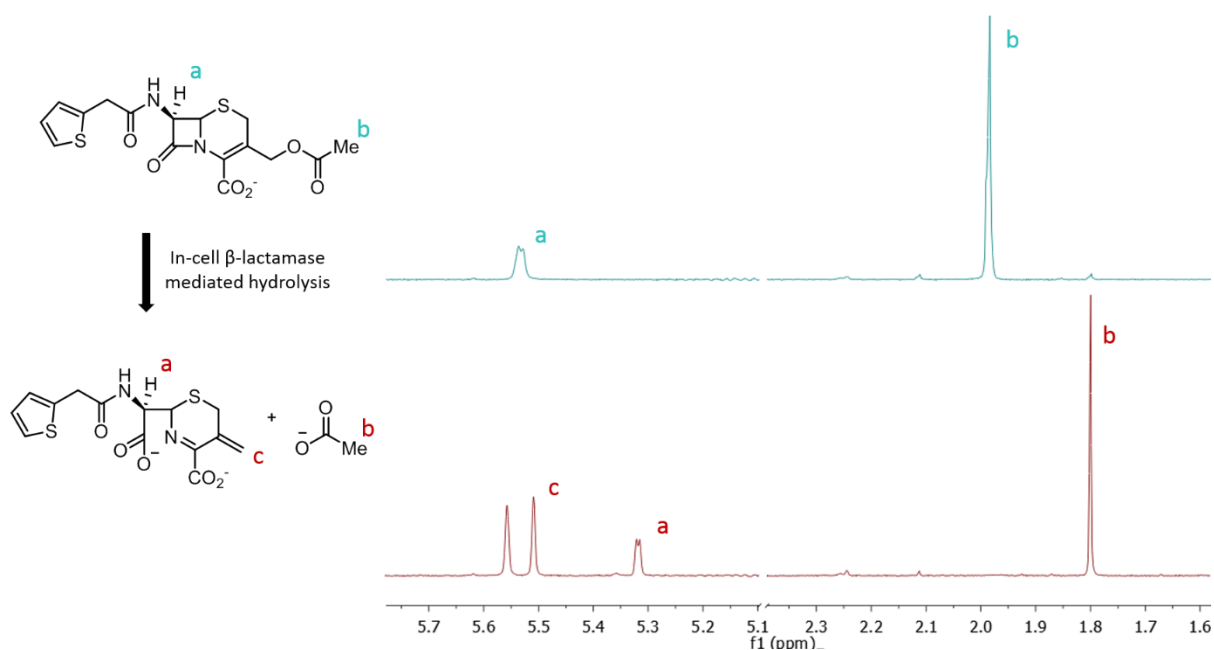

**Figure S2.** Example of  $^1\text{H}$  NMR signals used to determine  $\beta$ -Lactamase hydrolytic activity in whole-cell NMR assay. Chemical structures and section of the  $^1\text{H}$  NMR spectra of ciprofloxacin **31** (blue) and corresponding hydrolysis products (red).

**Table S1.** Summary of MIC values determined for ciprofloxacin **31** and pro-drug **35** against six uropathogenic *E. coli* clinical isolates.

| Strain      | MIC value in $\mu\text{M}$ , n=3 |                    |
|-------------|----------------------------------|--------------------|
|             | Ciprofloxacin <b>31</b>          | Pro-drug <b>35</b> |
| <b>Ec11</b> | 0.63                             | 0.63               |
| <b>Ec12</b> | > 5                              | > 5                |
| <b>Ec13</b> | > 5                              | > 5                |
| <b>Ec16</b> | 0.08                             | 0.31               |
| <b>Ec17</b> | 2.5                              | 2.5                |
| <b>Ec19</b> | > 5                              | > 5                |
| <b>Ec11</b> | 0.63                             | 0.63               |

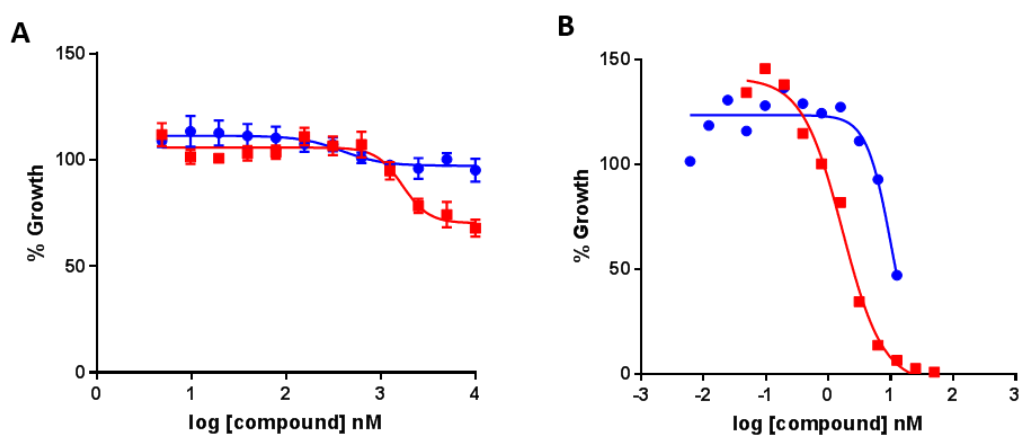

**Figure S3.** Antibacterial activities for pro-drug **35** (blue) and ciprofloxacin **31** (red) against *E. faecalis* (A) ATCC29212 and (B) GW01.

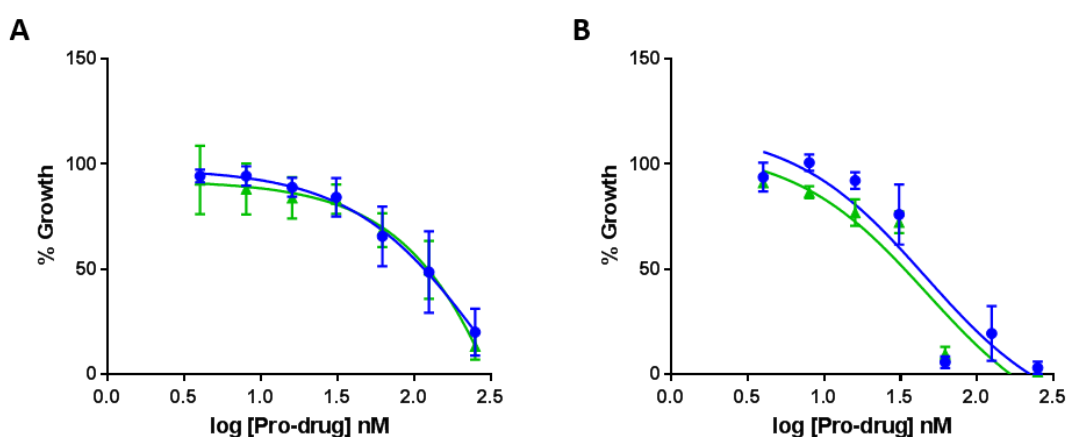

**Figure S4.** Antibacterial activities for pro-drug **35** against *E. coli* CFT073 expressing (A) empty plasmid (pEMP) and (B) CTX-M-15 (pCTX) with (green) and without (blue) serum.

## **Experimental Procedures (Biology)**

### **Recombinant $\beta$ -lactamase protein**

#### **Amp-C**

Recombinant Amp-C protein was purchased from Abcam (ab104926) and used without further purification.

#### **CTX-M-15**

Recombinant CTX-M-15 was expressed with an *N*-terminal His<sub>6</sub>-tag in SoluBL21 (DE3) cells and purified as described previously.<sup>1</sup> Briefly, bacterial cells were grown to an OD<sub>600</sub> of 0.6-0.8 in 2x YT media at 37 °C with shaking. CTX-M-15 expression was induced with 0.5 mM IPTG, after which cells were grown at 18 °C for a further 16 h. Cells were harvested by centrifugation at 6,500 xg for 10 mins at 4 °C before the pellet was resuspended in 50 mM Hepes (pH 7.5) with 400mM NaCl and complete EDTA-free protease inhibitor (Roche). Cells were homogenised and lysed via two passages through a cell disruptor (constant systems) at 30 kpsi. The resulting cell lysate was centrifuged at 100,000 xg for 1 hour at 4 °C before incubation with 4 ml of Ni-NTA bead slurry (Qiagen) for 1.5 hours with 10 mM imidazole to prevent non-specific binding. Ni-NTA resin bound to protein was washed with 50 mM Hepes pH 7.5, 400 mM NaCl, 10 mM imidazole followed by 50 mM Hepes pH 7.5, 300 mM NaCl, 20 mM imidazole and eluted after 5 minute incubation with 50 mM Hepes pH 7.5, 200 mM NaCl, 400 mM imidazole. The His<sub>6</sub> tag was cleaved and removed as described previously using 3C protease.<sup>3</sup>

## Bacterial Strains

**Supplementary Table 1.** Bacterial strains and characteristics relevant to this study

| <b>Bacterium/<br/>plasmid</b>     | <b>Relevant characteristics</b>                                                                                                                                | <b>Source/Ref</b>                   |
|-----------------------------------|----------------------------------------------------------------------------------------------------------------------------------------------------------------|-------------------------------------|
| <b><i>E. coli</i> strains</b>     |                                                                                                                                                                |                                     |
| DH5 $\alpha$                      | $\beta$ -lactam and ciprofloxacin susceptible                                                                                                                  |                                     |
| DH5 $\alpha$ pQE80                | Strain transformed with a multi-copy plasmid that contains a gene for a TEM116 $\beta$ -lactamase, conferring resistance to ampicillin and cephalosporins      | This study                          |
| DH5 $\alpha$ pCTX                 | Strain transformed with a multi-copy plasmid that contains the gene for the CTX-M-1 $\beta$ -lactamase, conferring resistance to ampicillin and cephalosporins | This study                          |
| CFT073                            | Isolated from a case of pyelonephritis (ATCC 700928). Ciprofloxacin susceptible.                                                                               | Mobley et al., 1990 <sup>4</sup>    |
| CFT073 pEMP                       | Transformed with empty pSU18. Does not express $\beta$ -lactamase.                                                                                             | This study                          |
| CFT073 pCTX                       | Expresses CTX-M-1 $\beta$ -lactamase. Resistant to penicillins and cephalosporins                                                                              | This study                          |
| CFT073 pNDM                       | Expresses NDM-1 $\beta$ -lactamase Resistant to penicillins, cephalosporins and carbapenems                                                                    | This study                          |
| CFT073 pKPC                       | Expresses KPC-3 $\beta$ -lactamase. Resistant to penicillins, cephalosporins and carbapenems                                                                   | This study                          |
| 11                                | Isolated from a human UTI. Expresses CTX-M-15 $\beta$ -lactamase. Ciprofloxacin susceptible.                                                                   | This study                          |
| 12                                | Isolated from a human UTI. Expresses CTX-M-15 $\beta$ -lactamase. Ciprofloxacin resistant.                                                                     | This study                          |
| 13                                | Isolated from a human UTI. Expresses CTX-M-15 $\beta$ -lactamase. Ciprofloxacin resistant.                                                                     | This study                          |
| 16                                | Isolated from a human UTI. Expresses CTX-M-15 $\beta$ -lactamase. Ciprofloxacin susceptible.                                                                   | This study                          |
| 17                                | Isolated from a human UTI. Expresses CTX-M-15 $\beta$ -lactamase. Ciprofloxacin susceptible.                                                                   | This study                          |
| 19                                | Isolated from a human UTI. Expresses CTX-M-15 $\beta$ -lactamase. Ciprofloxacin resistant.                                                                     | This study                          |
| <b><i>E. faecalis</i> strains</b> |                                                                                                                                                                |                                     |
| ATCC29212                         | Vancomycin-sensitive strain isolated from a human UTI.                                                                                                         | American type culture collection    |
| GW01                              | Vancomycin-sensitive strain isolated from a human UTI.                                                                                                         | This study                          |
|                                   |                                                                                                                                                                |                                     |
| <b>Plasmids</b>                   |                                                                                                                                                                |                                     |
| pEMP                              | pSU18 vector without coding sequences for beta-lactamases.                                                                                                     | Bartolomé et al., 1991 <sup>5</sup> |
| pCTX                              | pSU18 containing the native coding sequence for CTX-M1 under the control of the native promoter                                                                | Brem et al., 2016 <sup>6</sup>      |

|      |                                                                                                |                                               |
|------|------------------------------------------------------------------------------------------------|-----------------------------------------------|
| pNDM | pSU18 containing the native coding sequence for NDM-1 under the control of the native promoter | Jiménez-Castellanos et al., 2018 <sup>7</sup> |
| pKPC | pSU18 containing the native coding sequence for KPC-3 under the control of the native promoter | Brem et al., 2016 <sup>6</sup>                |

### **Transformation of *E. coli* with plasmids**

Plasmids were introduced via heat shock into chemically competent DH5a and via electroporation into *E. coli* CFT073 following published protocols.<sup>8</sup>

### **Bacterial cultures**

The bacterial strains and plasmids used in this study are detailed in Supplementary Table 1. *E. coli* was grown in Mueller-Hinton Broth (MHB) or Lennox Broth (LB) at 37 °C, with shaking (180 r.p.m.) overnight (16-18 h). Where required, culture medium was supplemented with Chloramphenicol (25 µg ml<sup>-1</sup>). *E. faecalis* was grown statically in Brain-Heart Infusion Broth (BHI) at 37 °C in 5% CO<sub>2</sub> overnight (16-18 h).

### **Assay Procedures**

#### **Determination of MIC**

MIC assays were performed in 96-well thermo scientific Nuclon Delta Surface plates and MICs were determined in accordance with the broth microdilution protocol.<sup>7</sup> *E. coli* grown to stationary-phase in MHB or LB were adjusted to OD<sub>600</sub> nm of 0.05 in MHB and supplemented with a range of concentrations (two-fold dilution series) of ciprofloxacin or test compounds. For some assays with *E. coli*, MHB was supplemented with 10 % normal human serum (Sigma-Aldrich). For assays with *E. faecalis*, BHI was used in place of MHB.

After static incubation at 37 °C for 18 h in air (*E. coli*) or 5 % CO<sub>2</sub> (*E. faecalis*), the MIC was determined as the lowest concentration of antibiotic that inhibited visible bacterial growth. OD<sub>595</sub> measurements were recorded on a BioRad 1Mark Microplate Reader. Measurements were background corrected against the no-inoculum control and normalized to the no-drug control.

### **Determination of bactericidal activity**

Stationary-phase bacteria were inoculated into 3 ml MHB containing no antibiotic, ciprofloxacin (78 nM) or prodrug (78 nM), to give an OD<sub>600 nm</sub> of 0.1. Cultures were subsequently incubated at 37 °C with shaking (180 r.p.m.) and bacterial viability determined by c.f.u. counts. All compound concentrations were at 2.5 × MIC of ciprofloxacin, which has been shown previously to be bactericidal.

### **Recombinant β-lactamase assay**

Each compound was incubated for 1 hour at room temperature in 100 mM NaPO<sub>4</sub> (pH 7) ± 0.5 M NaOH. The wavelength at which the difference between un-hydrolysed and hydrolysed compound was the greatest was selected (typically 263 nm) and a compound concentration vs. absorbance standard curve was generated. Compounds, typically 250 μM in assay buffer (100 mM NaPO<sub>4</sub> (pH 7)), were dispensed into a Corning 96-well UV transparent flat bottom plate. Recombinant Amp-C in assay buffer was added immediately before incubation in the microplate reader at 37 °C. UV absorbance was measured every 20 s for 1 h on a BMG LABTECH SPECTROstarNano. Kinetic parameters were determined by half-life analysis.

### **NMR β-lactamase hydrolysis assay**

Overnight bacterial cultures (5 – 25 ml) were pelleted by centrifugation at 3,200 x g for 20 min at 4 °C. Pellets were washed twice with 100 mM NaPO<sub>4</sub> (pH 7.0), 10 mM MgCl<sub>2</sub> and cultures were corrected to an OD<sub>600 nm</sub> of 2.5 in 100 mM NaPO<sub>4</sub> (pH 7.0), 10 mM MgCl<sub>2</sub>,

10% (v/v) deuterated water. Compounds were prepared in deuterated DMSO and added to 700  $\mu$ l of culture to give a final compound concentration of 100  $\mu$ M and incubated at room temperature for 1 h.

$^1\text{H}$  NMR spectra were collected at 298 K on a Bruker 500MHz AVANCE III HD spectrometer running TopSpin3.2 and equipped with a z-gradient bbfo/5mm tuneable SmartProbe and a GRASP II gradient spectroscopy accessory providing a maximum gradient output (100%) of 53.5G/cm (5.35G/cmA).  $^1\text{H}$  water suppression spectra<sup>8</sup> were collected using the Bruker pulse program zgesgp at a frequency of 500.13MHz with a spectral width of 10 kHz (centred on 4.705 ppm) and 65536 data points. A relaxation delay of 1s was employed along with square shaped 180o selective pulses of 2 ms (Squa100.1000 from Bruker library) and gradients pulses of 1ms. The strength of the first pair of gradient pulses was 31% and the second pair 11%. All gradient pulses were smoothed-square shaped (SMSQ10.100 from Bruker library) and after each application a recovery delay of 200us used. 64 transients were collected after 4 dummy scans. The data was processed using 65536 data points applying an exponential function with a line broadening of 0.3 Hz. Integration of peaks corresponding to the intact and hydrolysed products was performed using MestReNova 8.0 and used to determine the percentage hydrolysis.

### **Recombinant DNA gyrase assay**

The *E. coli* gyrase supercoiling assay (Inspiralis) was performed according to the manufacturer's instructions with the addition of 6 nM recombinant CTX-M-15 where required. Samples were loaded on a 1% (w/v) agarose gel prepared with Tris/Borate/EDTA (TBE) or Tris/Acetate/EDTA (TAE) buffer. Electrophoresis was carried out at 100 V for 90 minutes. The gel was then stained with SYBR Safe DNA gel stain (Invitrogen) (1:1000 dilution in TBE) for 30 min. Visualization was performed using a Syngene Gel Doc system.



Quantification of gel bands corresponding to supercoiled DNA was performed using ImageJ 1.52a. Values were background corrected against the no-gyrase control and normalized to gyrase only activity. Gyrase activity values reflects the mean of three or four independent replicates  $\pm$  SEM.

Compound **8** -  $^1\text{H}$  NMR (DMSO- $d_6$ , 400 MHz) and  $^{13}\text{C}$  NMR (DMSO- $d_6$ , 101 MHz)

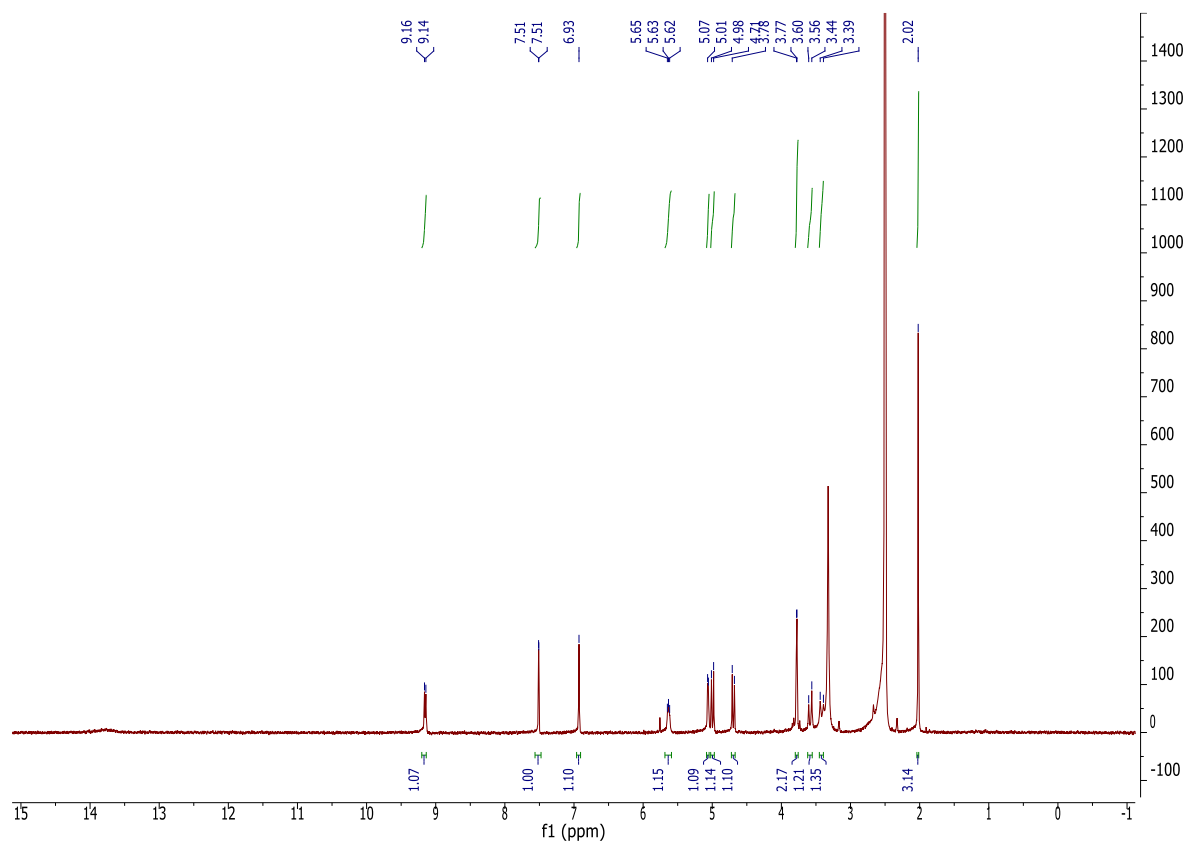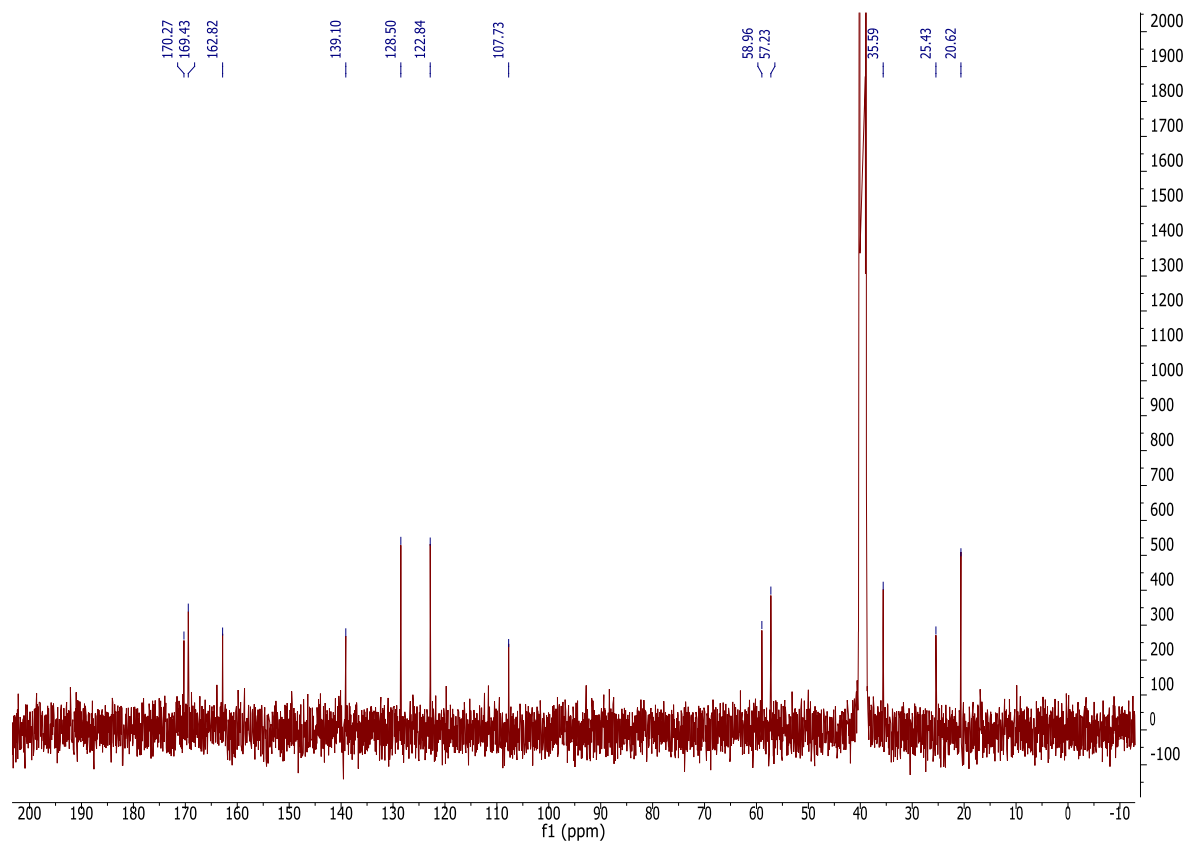

Compound 9 -  $^1\text{H}$  NMR (DMSO- $d_6$ , 400 MHz) and  $^{13}\text{C}$  NMR (DMSO- $d_6$ , 101 MHz)

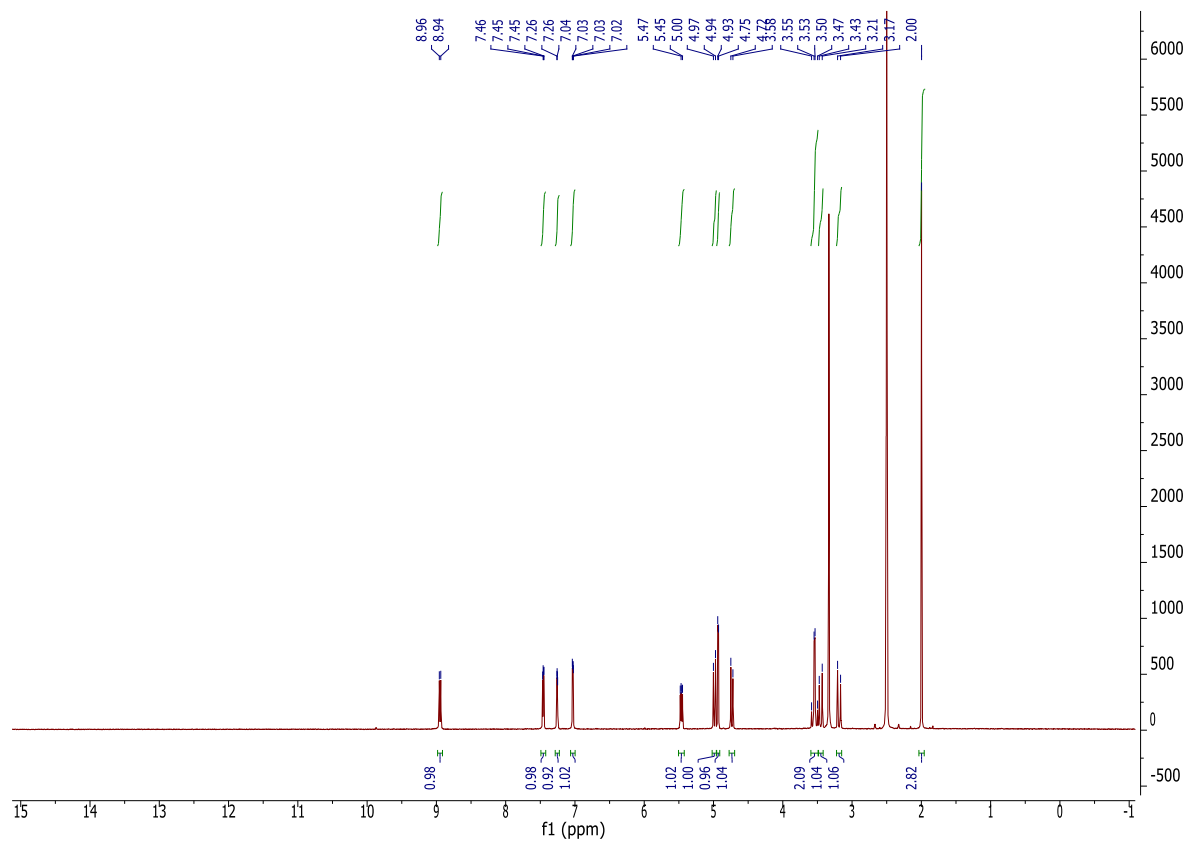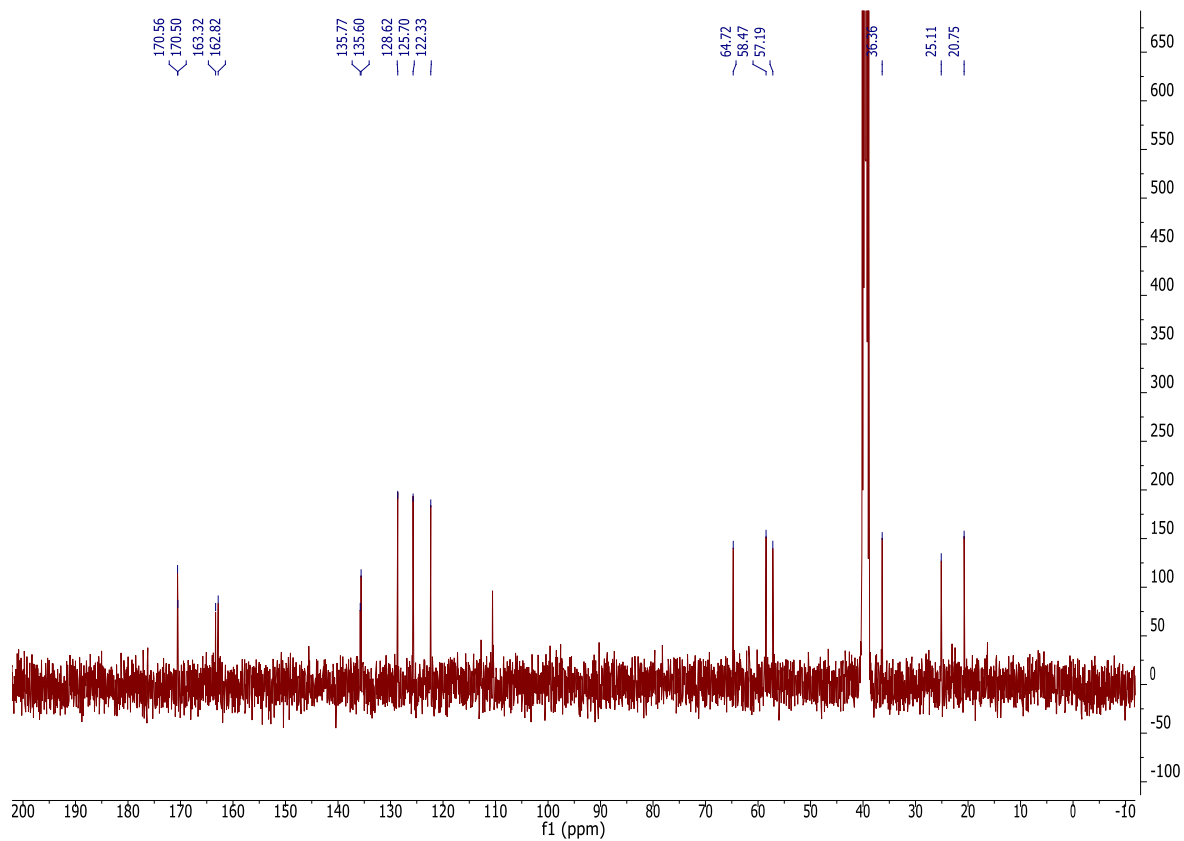

Compound **10** -  $^1\text{H}$  NMR (DMSO- $d_6$ , 400 MHz) and  $^{13}\text{C}$  NMR (DMSO- $d_6$ , 101 MHz)

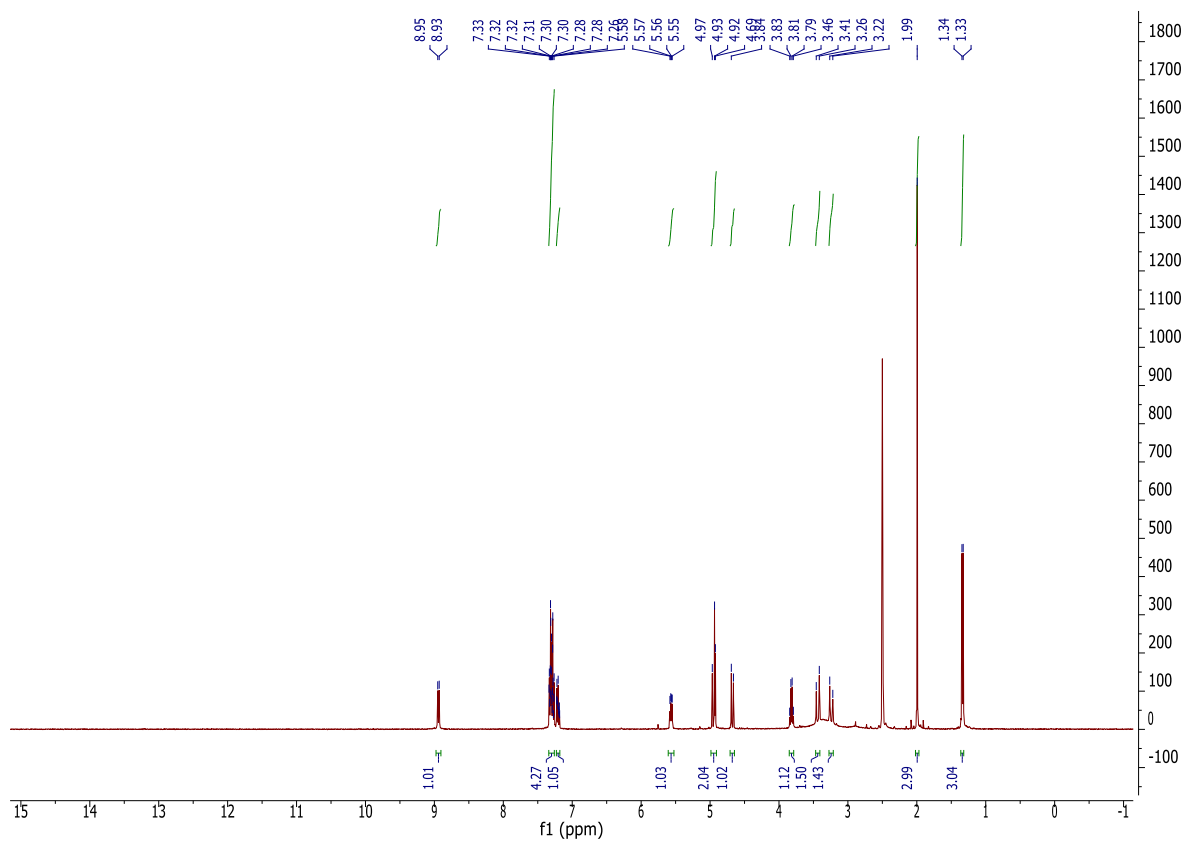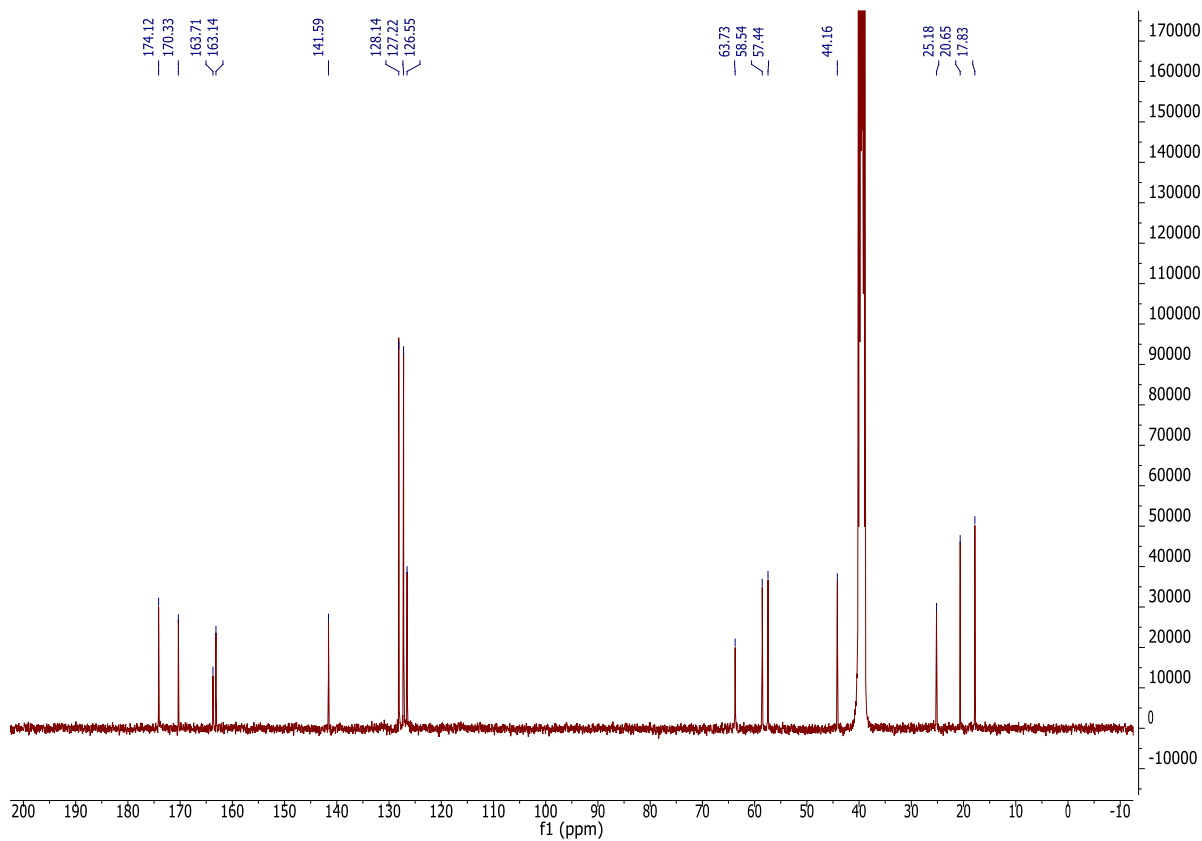

Compound 11 -  $^1\text{H}$  NMR (DMSO- $d_6$ , 400 MHz) and  $^{13}\text{C}$  NMR (DMSO- $d_6$ , 101 MHz)

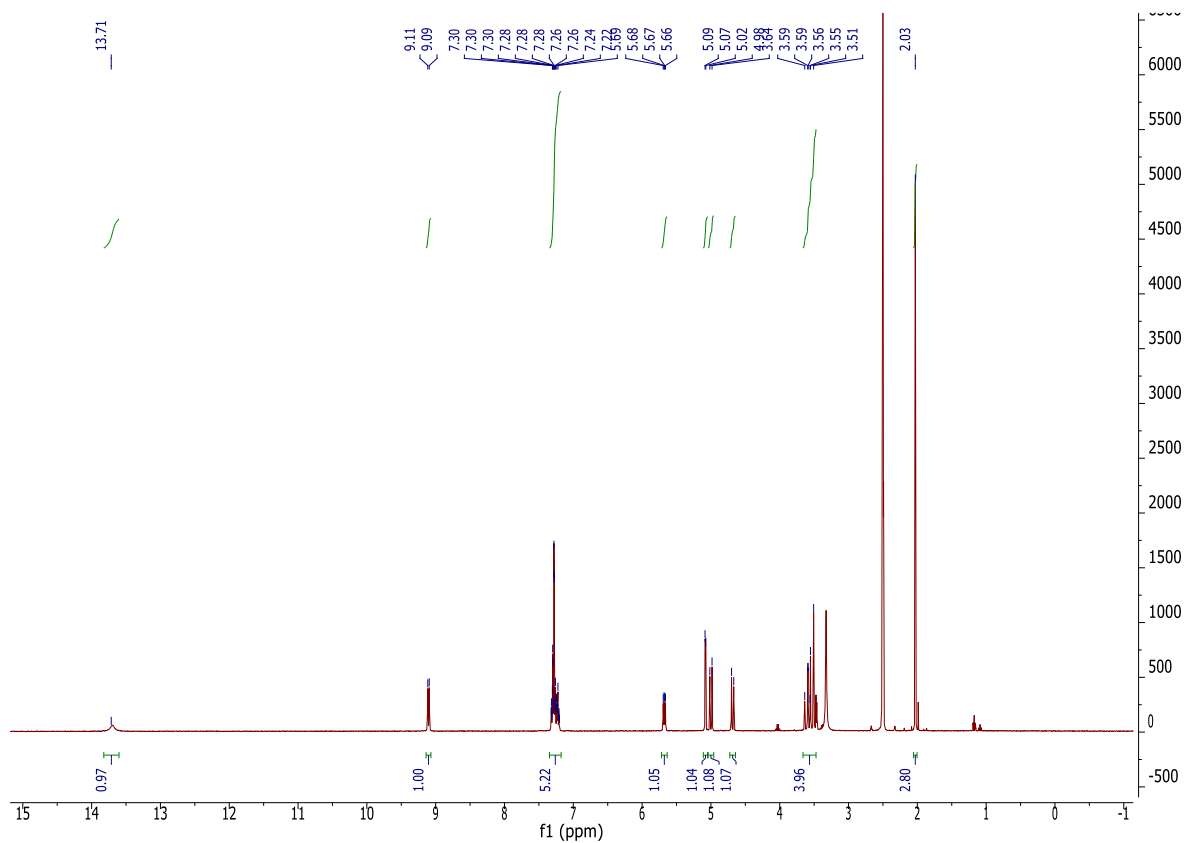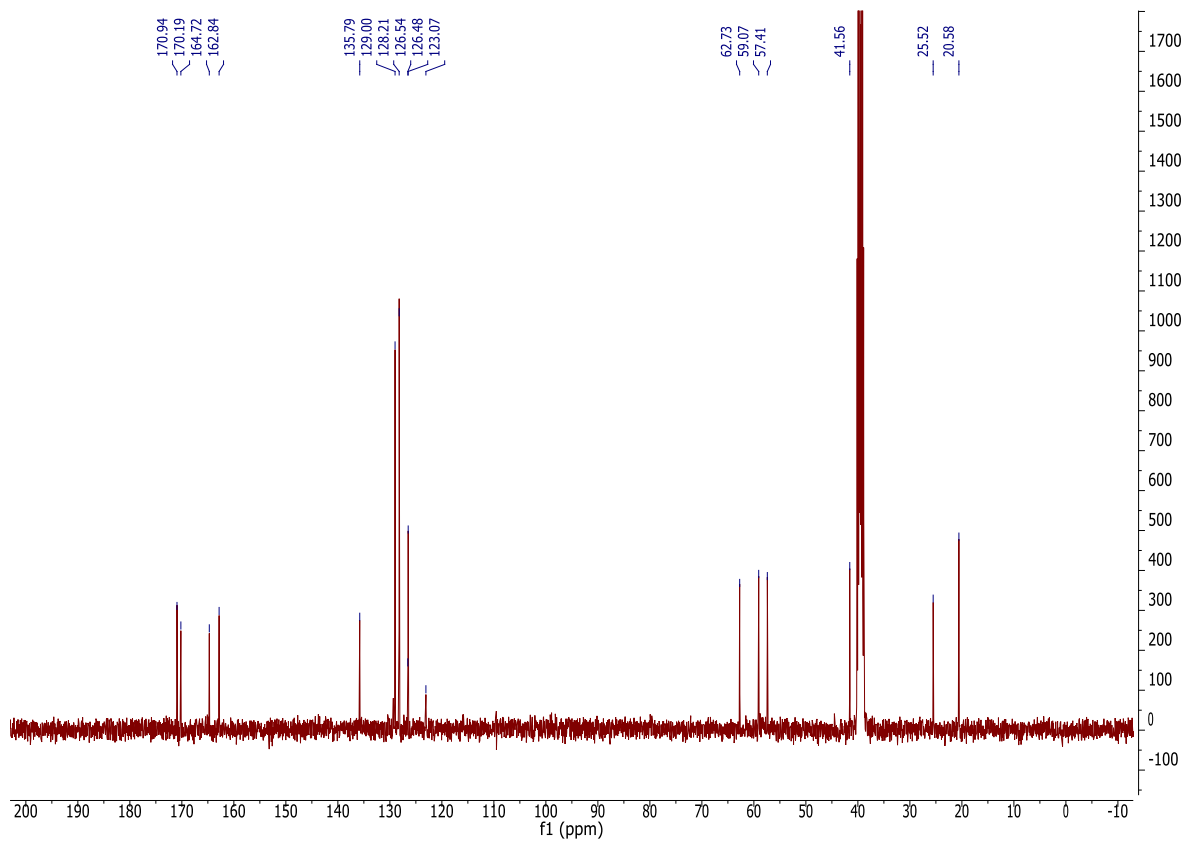

Compound **12** -  $^1\text{H}$  NMR (DMSO- $d_6$ , 400 MHz) and  $^{13}\text{C}$  NMR (DMSO- $d_6$ , 101 MHz)

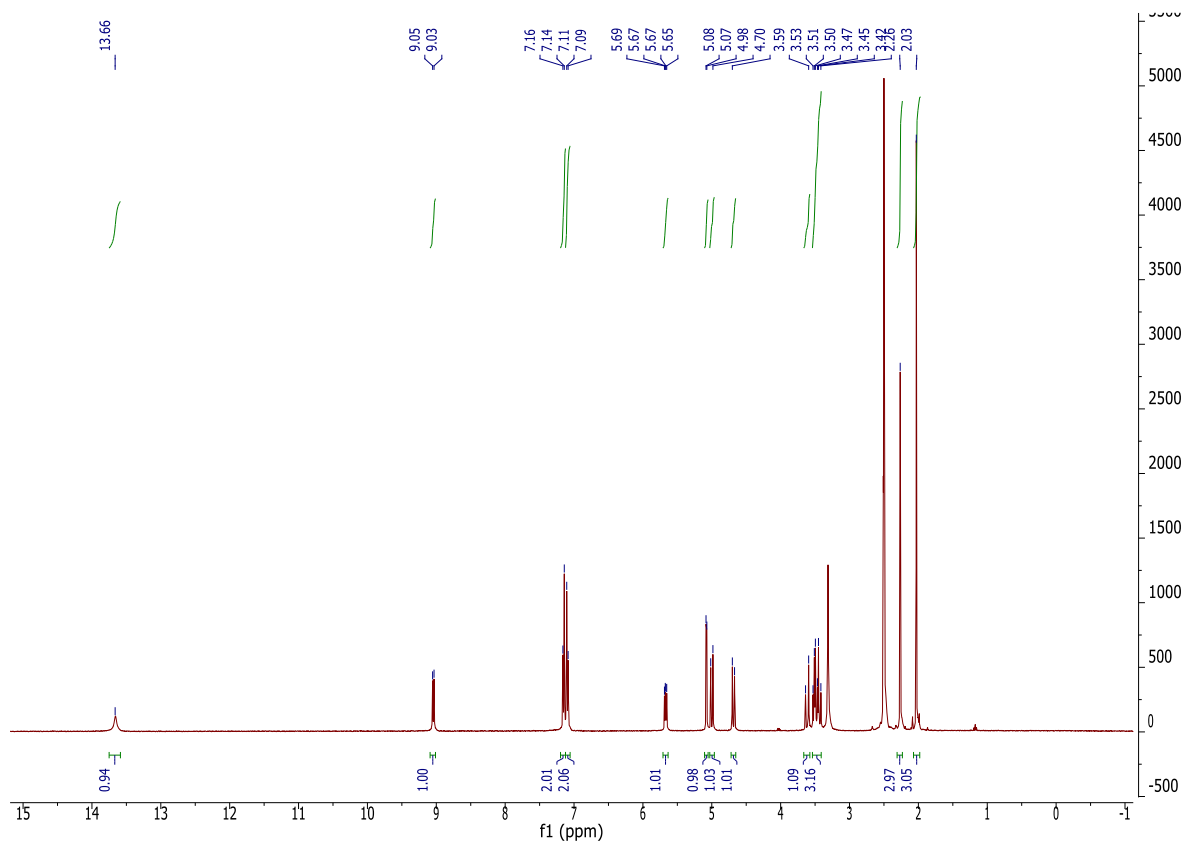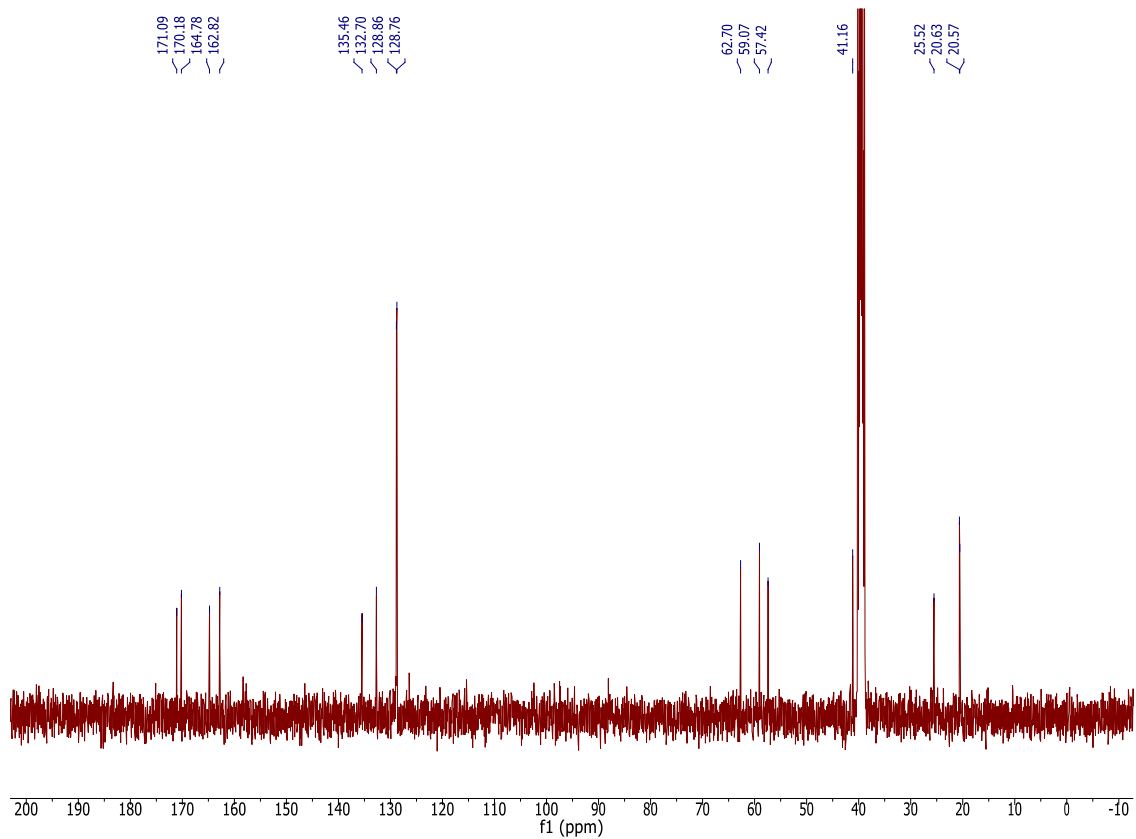

Compound 13 -  $^1\text{H}$  NMR (DMSO- $d_6$ , 400 MHz) and  $^{13}\text{C}$  NMR (DMSO- $d_6$ , 101 MHz)

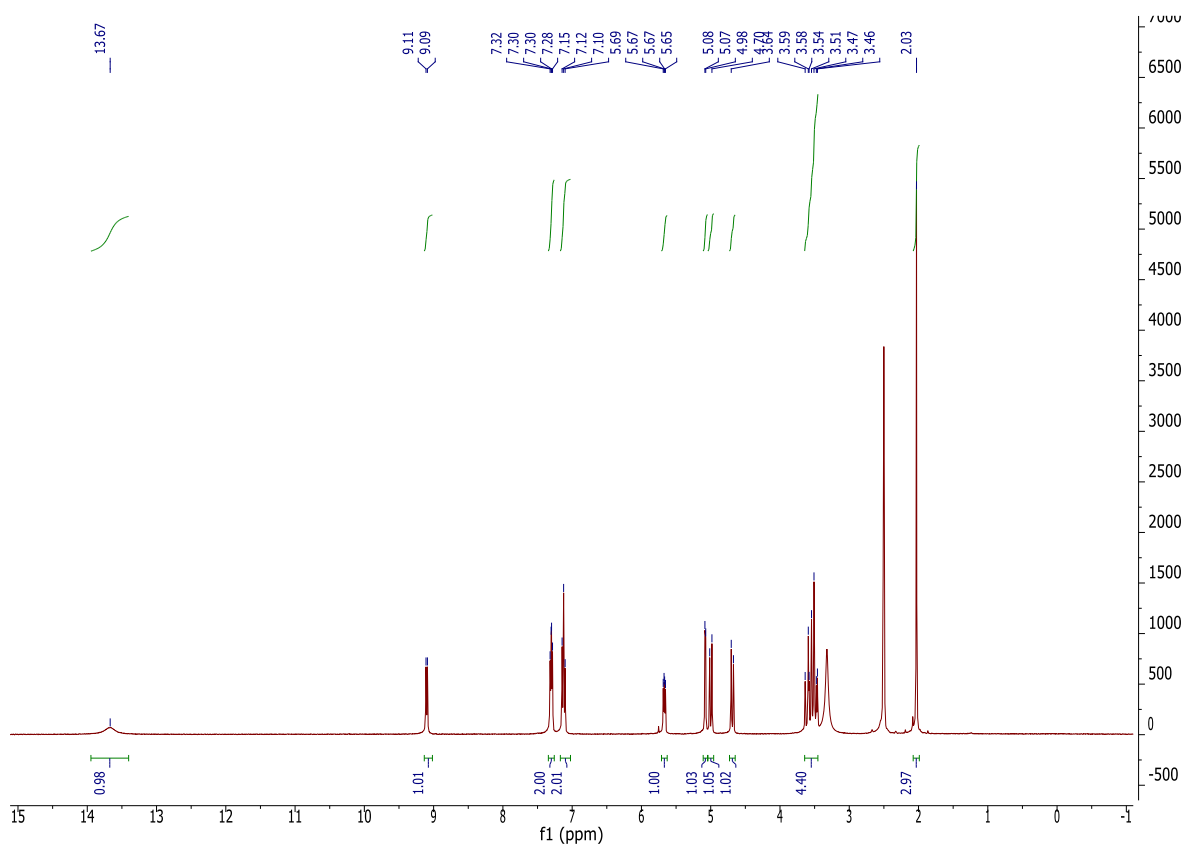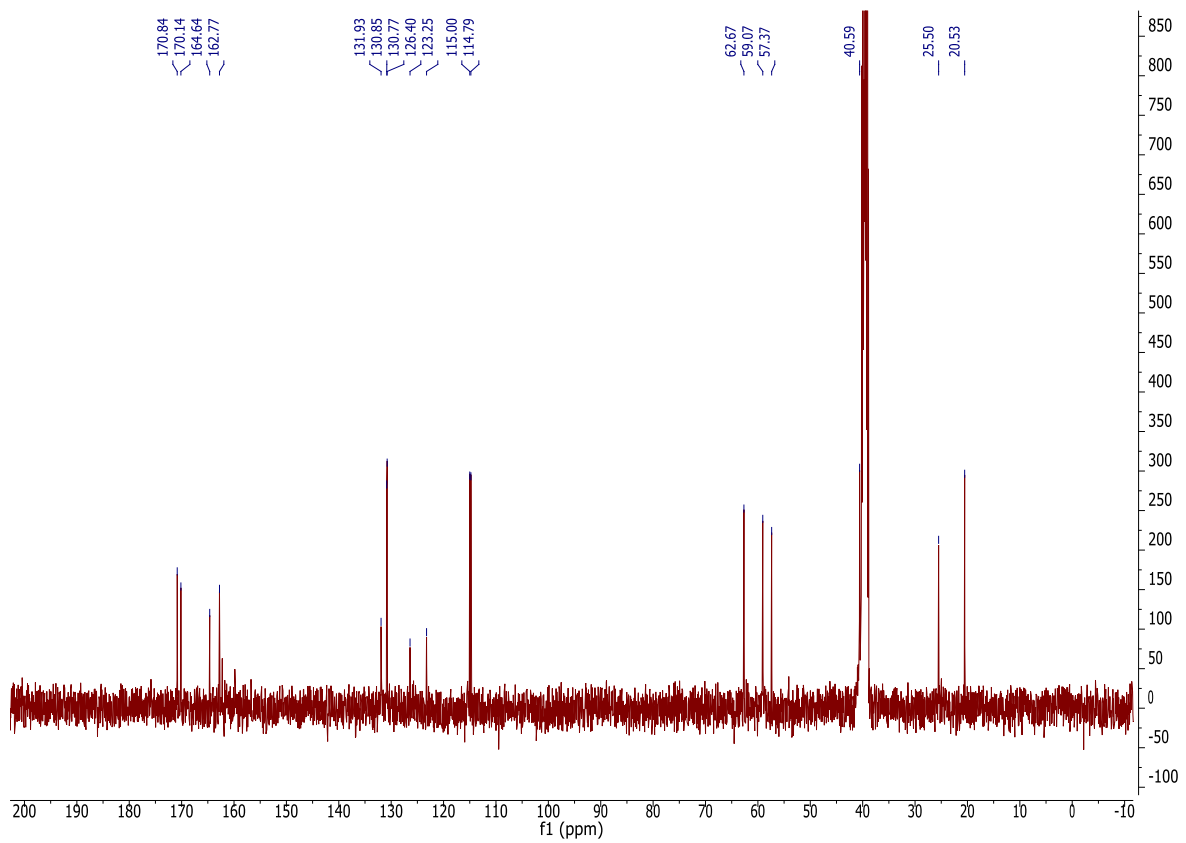

Compound 14 -  $^1\text{H}$  NMR (DMSO- $d_6$ , 400 MHz) and  $^{13}\text{C}$  NMR (DMSO- $d_6$ , 101 MHz)

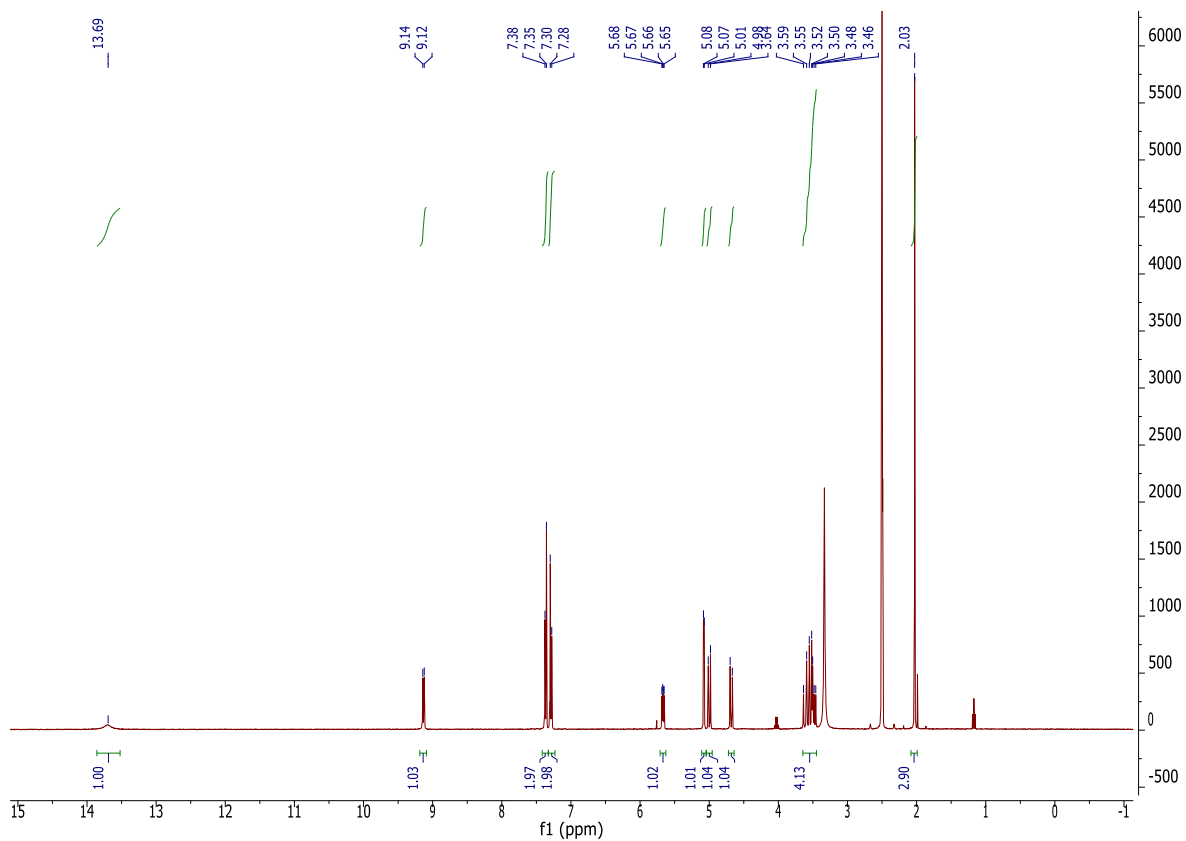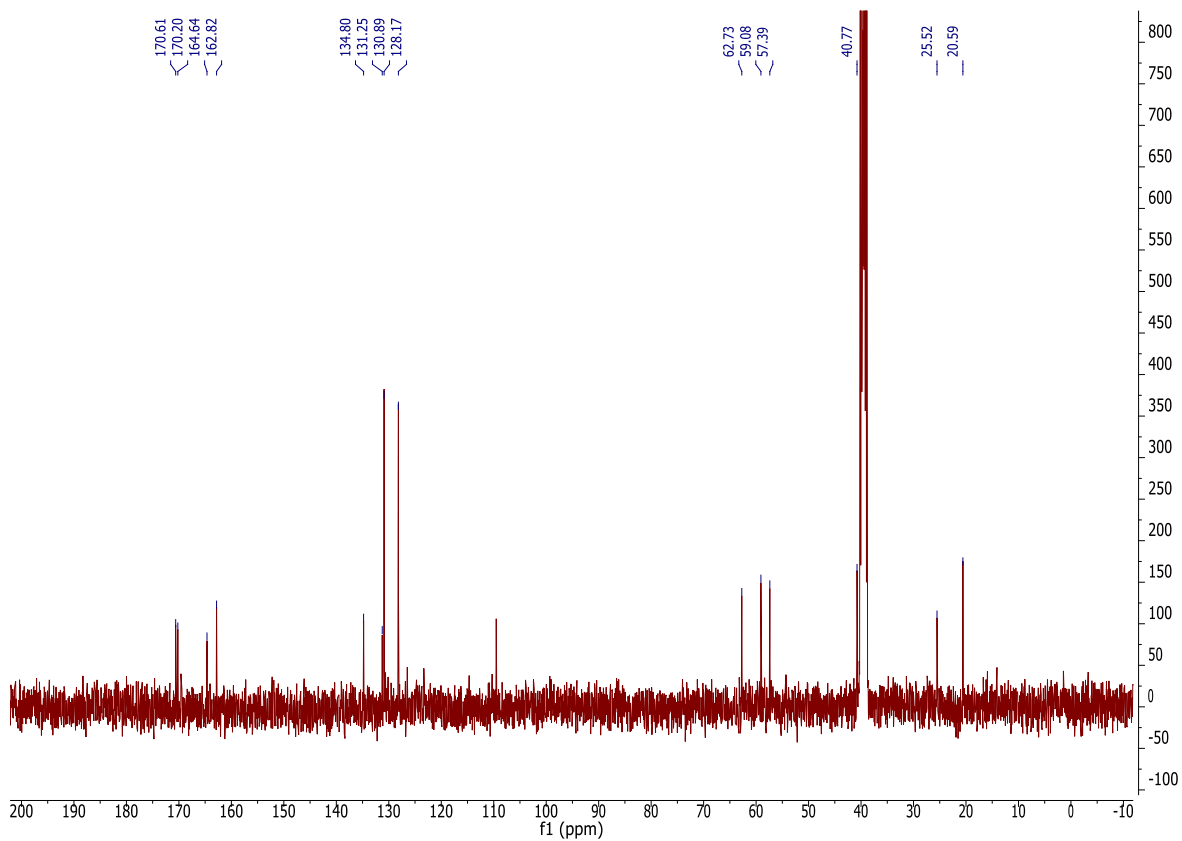



Compound 15 -  $^1\text{H}$  NMR (DMSO- $d_6$ , 400 MHz) and  $^{13}\text{C}$  NMR (DMSO- $d_6$ , 101 MHz)

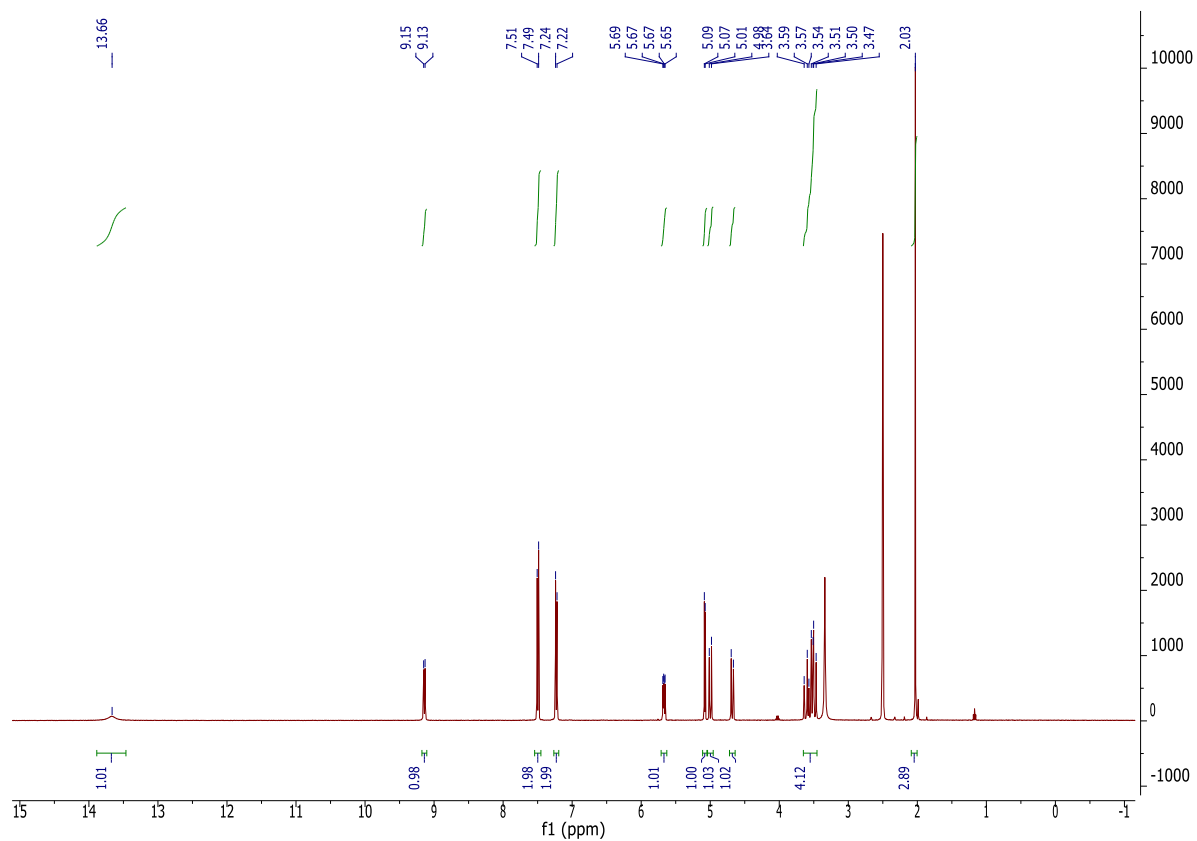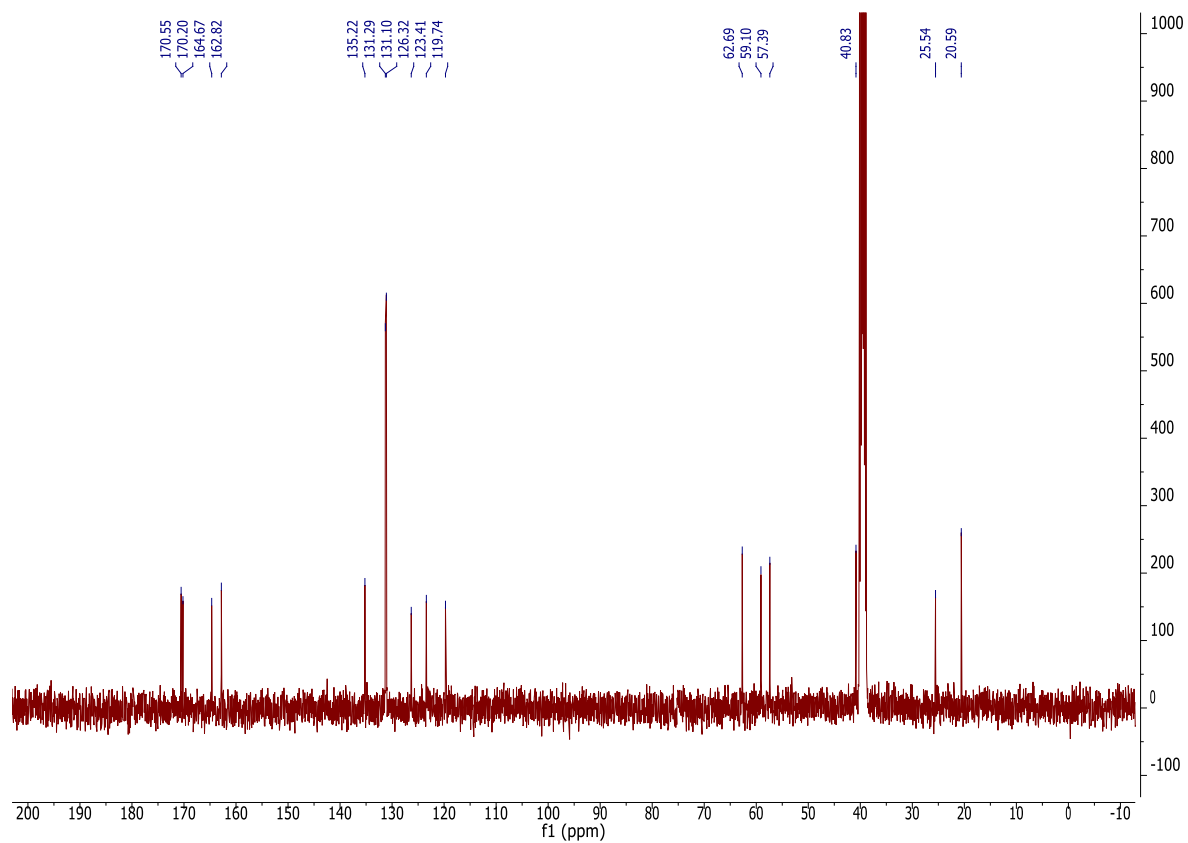

Compound 16 -  $^1\text{H}$  NMR (DMSO- $d_6$ , 400 MHz) and  $^{13}\text{C}$  NMR (DMSO- $d_6$ , 101 MHz)

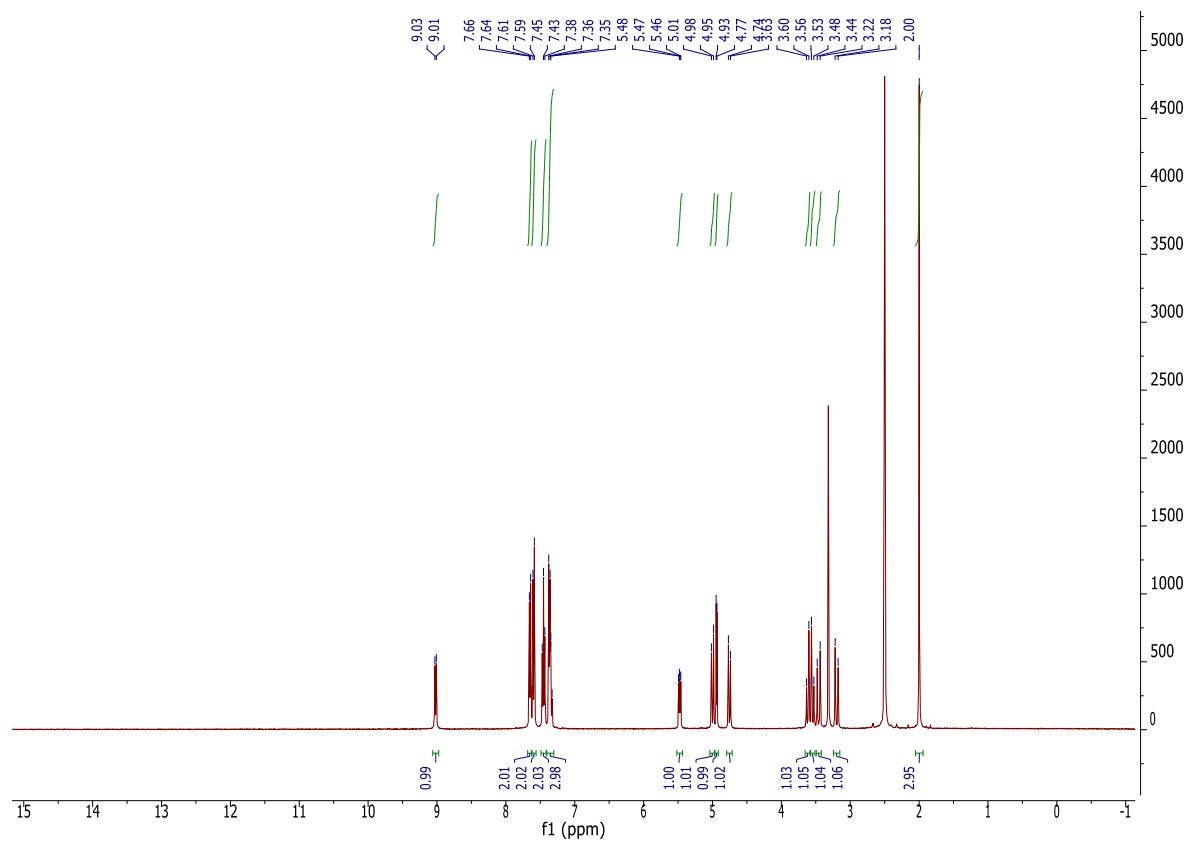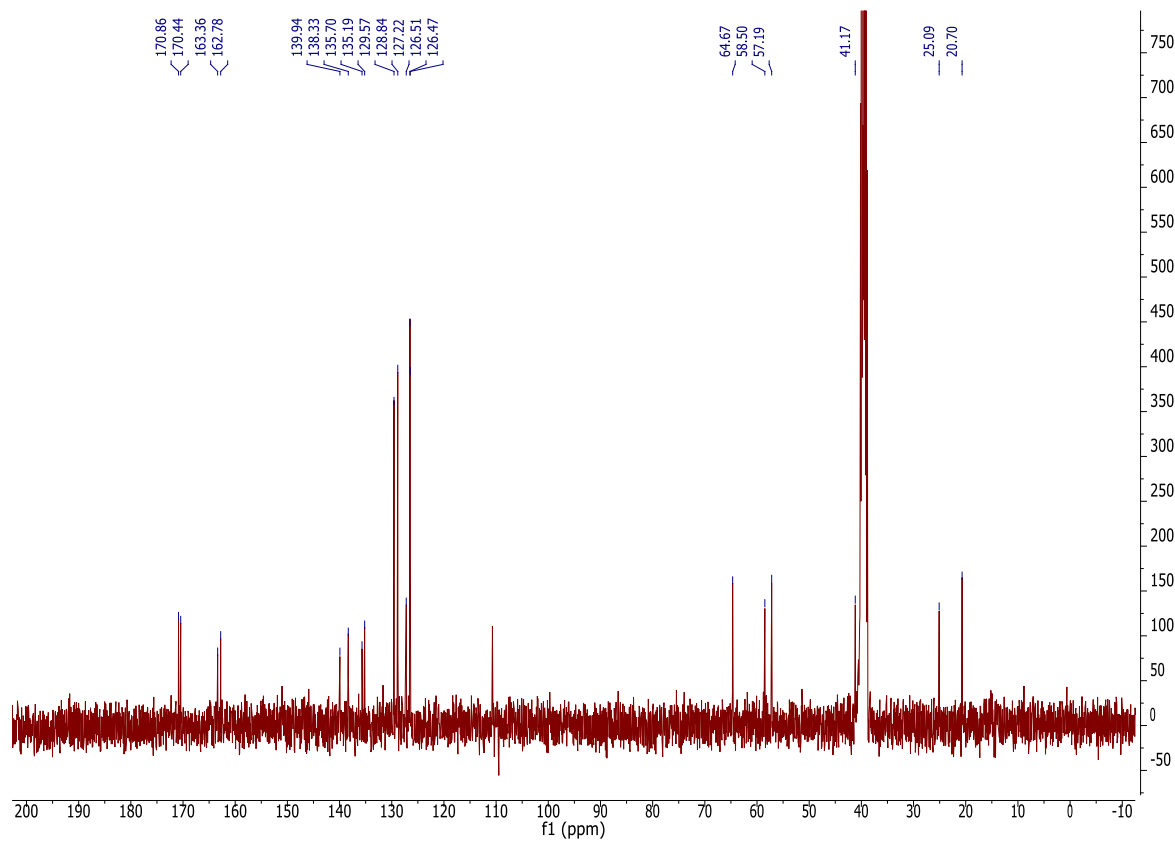

Compound 17 -  $^1\text{H}$  NMR (DMSO- $d_6$ , 400 MHz) and  $^{13}\text{C}$  NMR (DMSO- $d_6$ , 101 MHz)

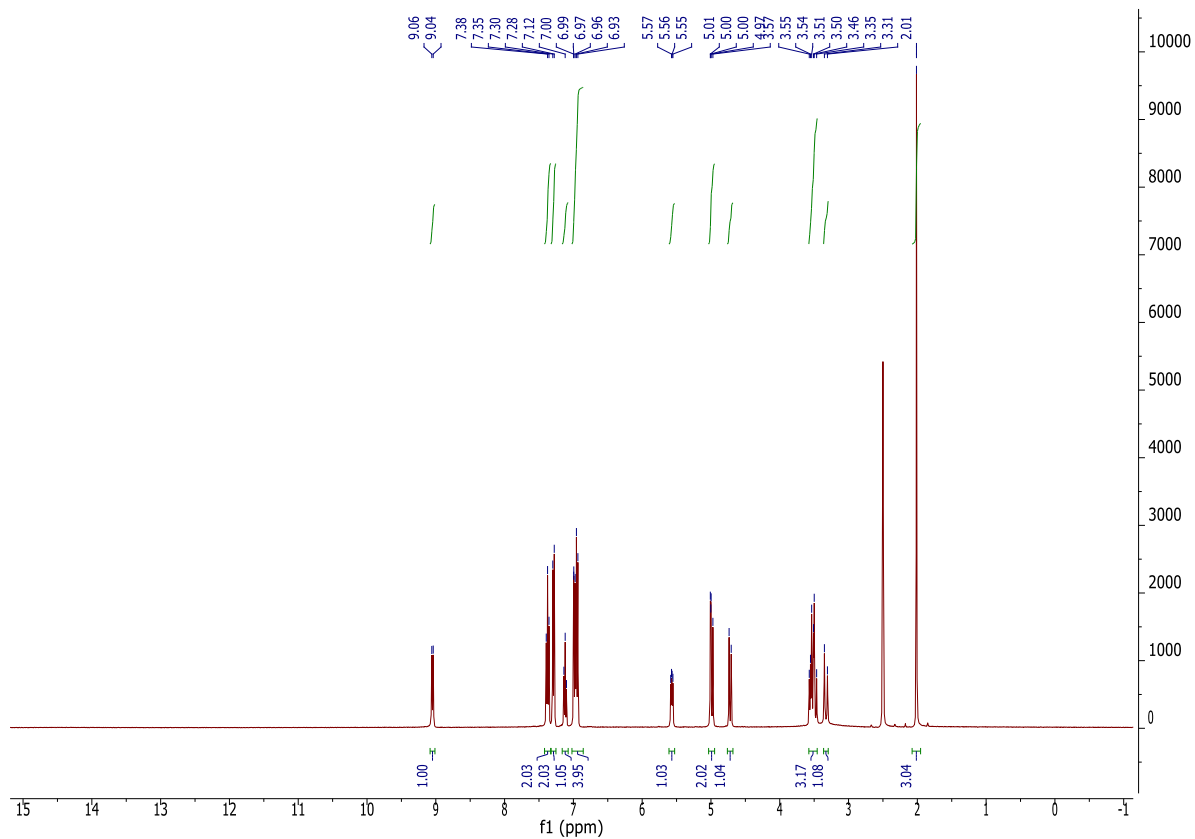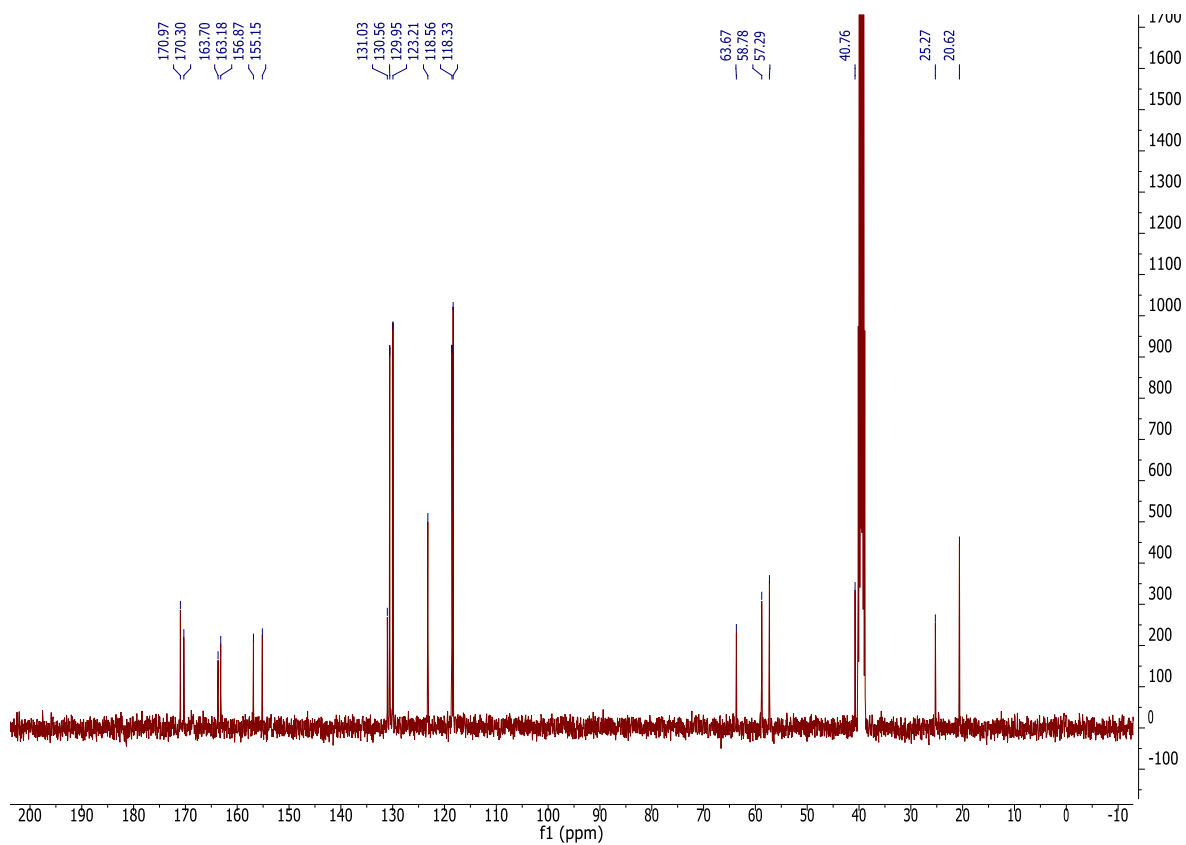

Compound **18** -  $^1\text{H}$  NMR (DMSO- $d_6$ , 400 MHz) and  $^{13}\text{C}$  NMR (DMSO- $d_6$ , 101 MHz)

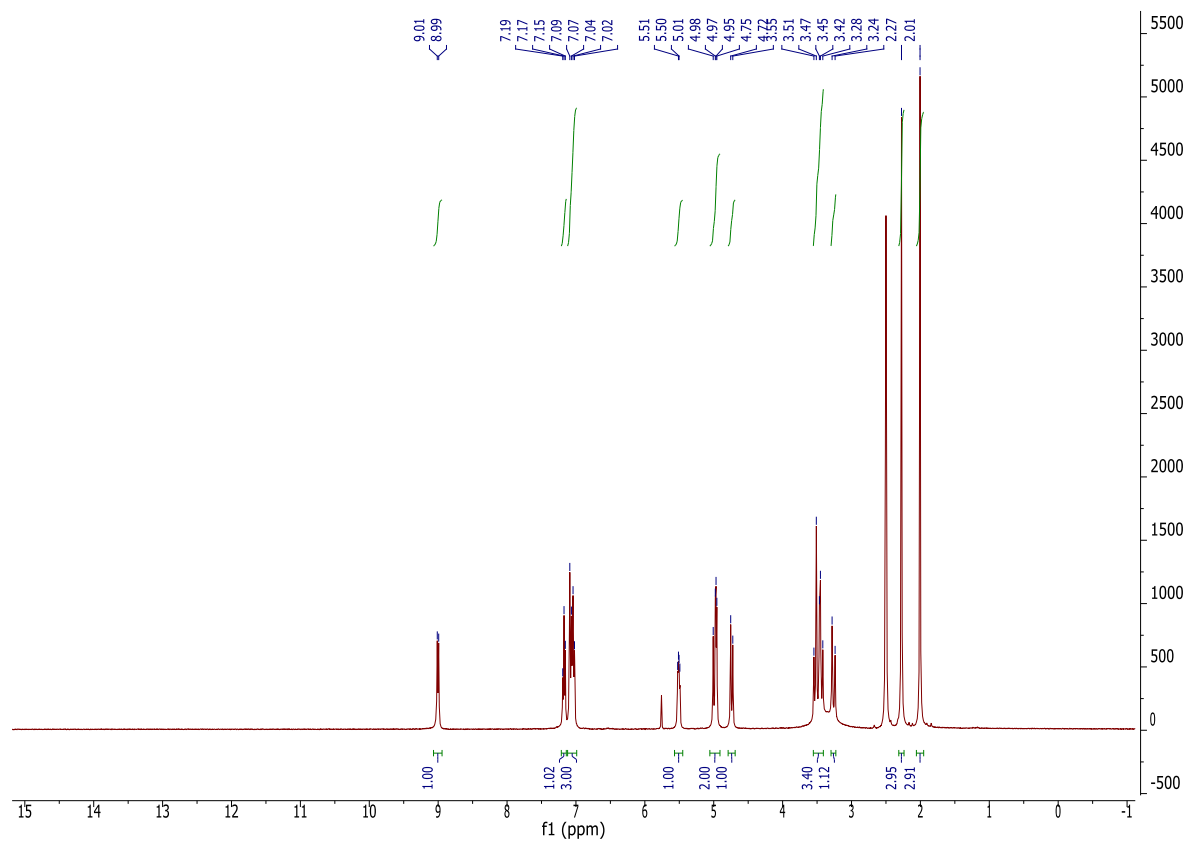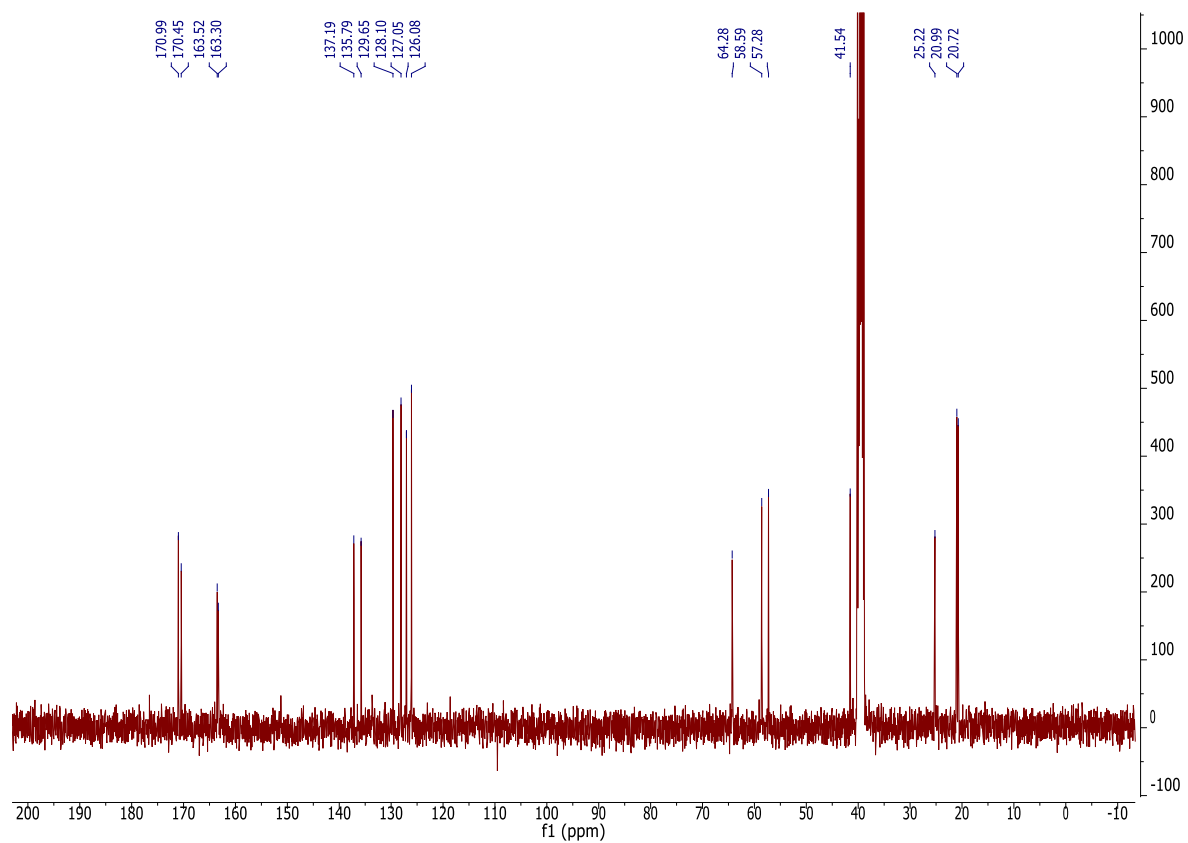

Compound 19 -  $^1\text{H}$  NMR (DMSO- $d_6$ , 400 MHz) and  $^{13}\text{C}$  NMR (DMSO- $d_6$ , 101 MHz)

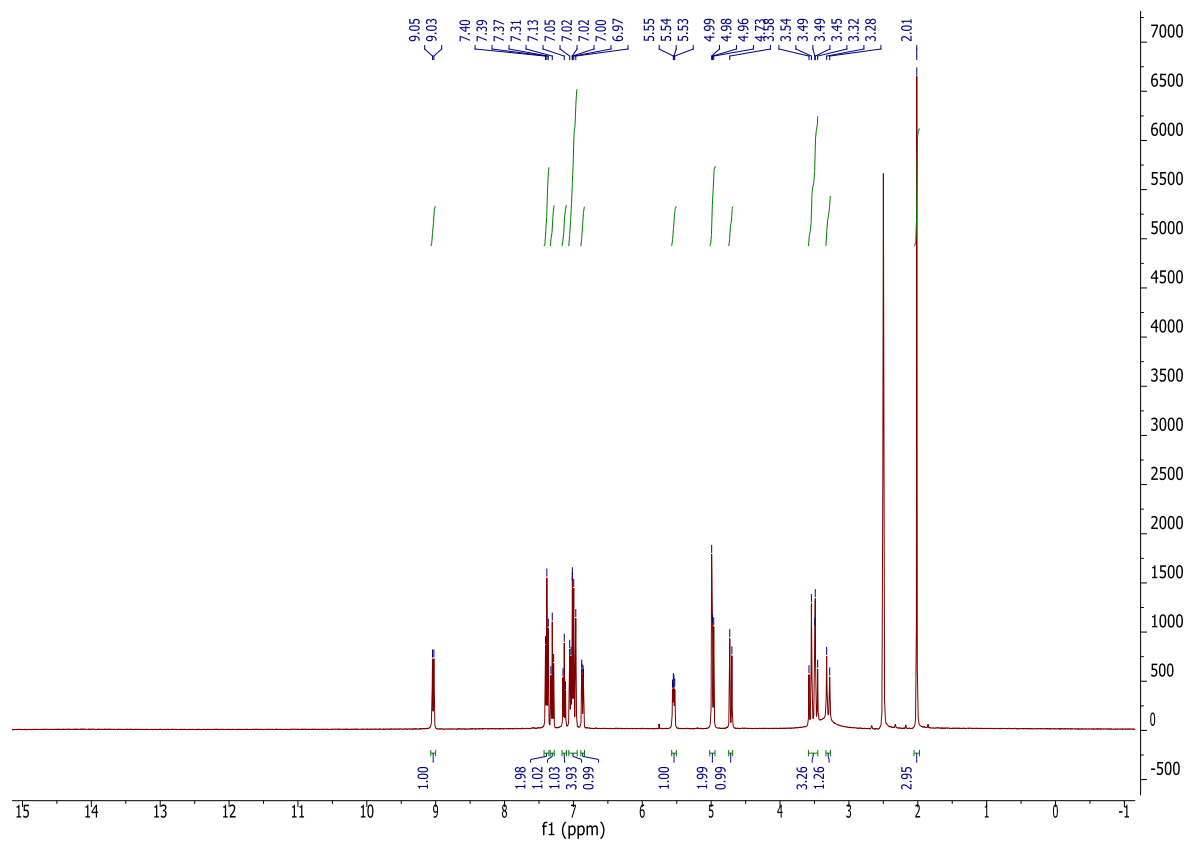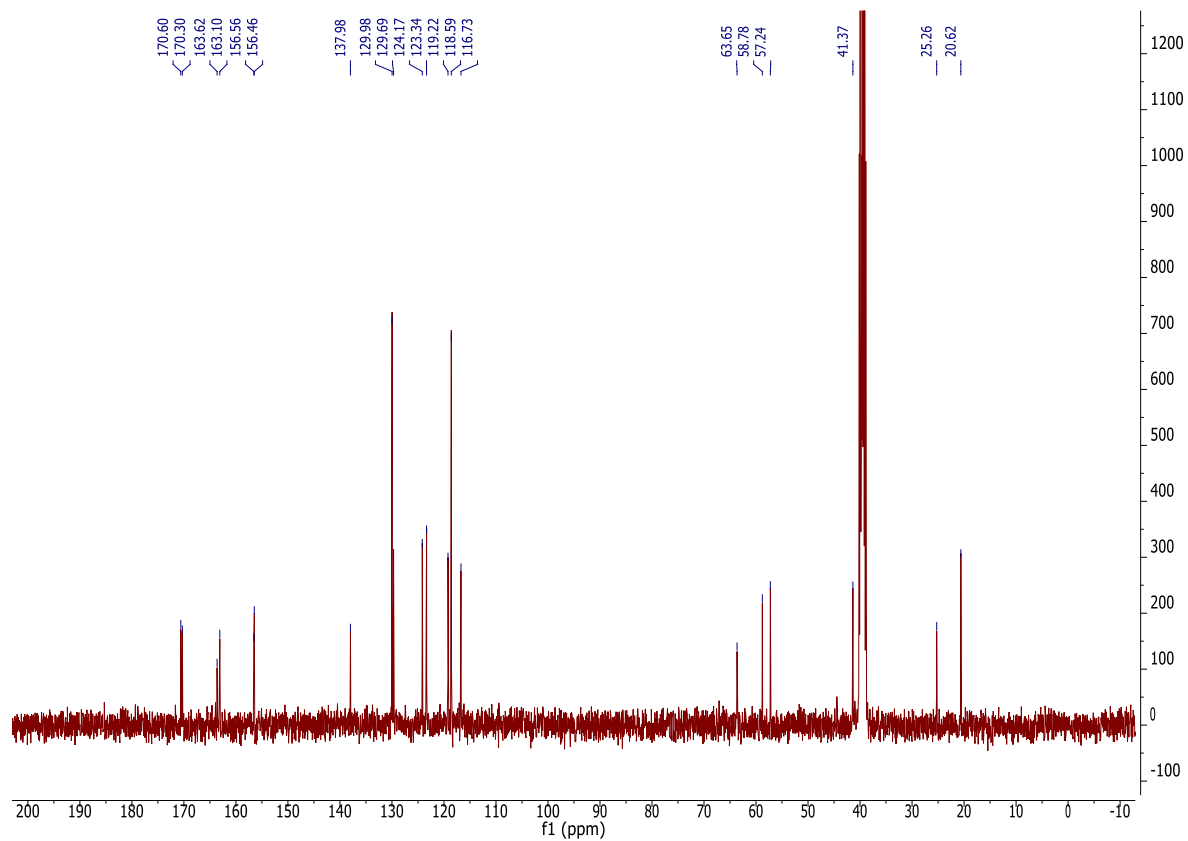

Compound **20** -  $^1\text{H}$  NMR (DMSO- $d_6$ , 400 MHz) and  $^{13}\text{C}$  NMR (DMSO- $d_6$ , 101 MHz)

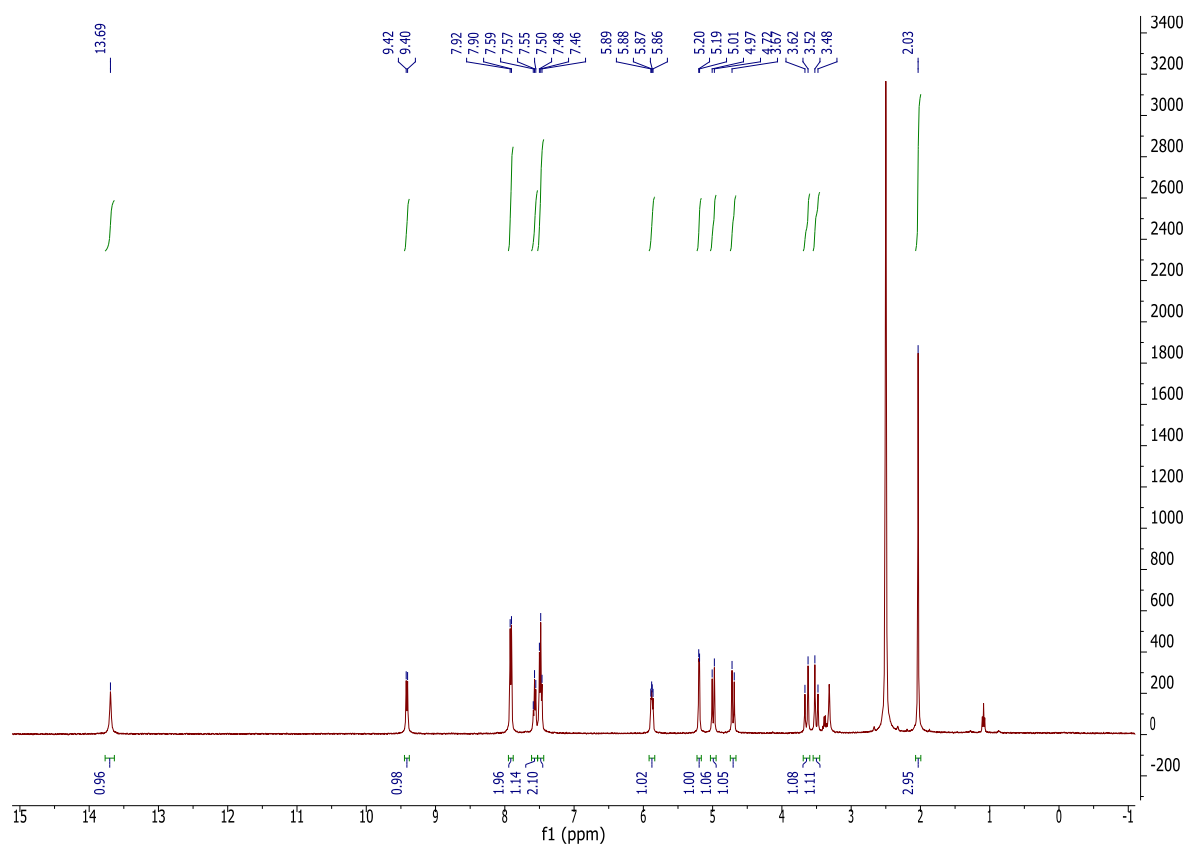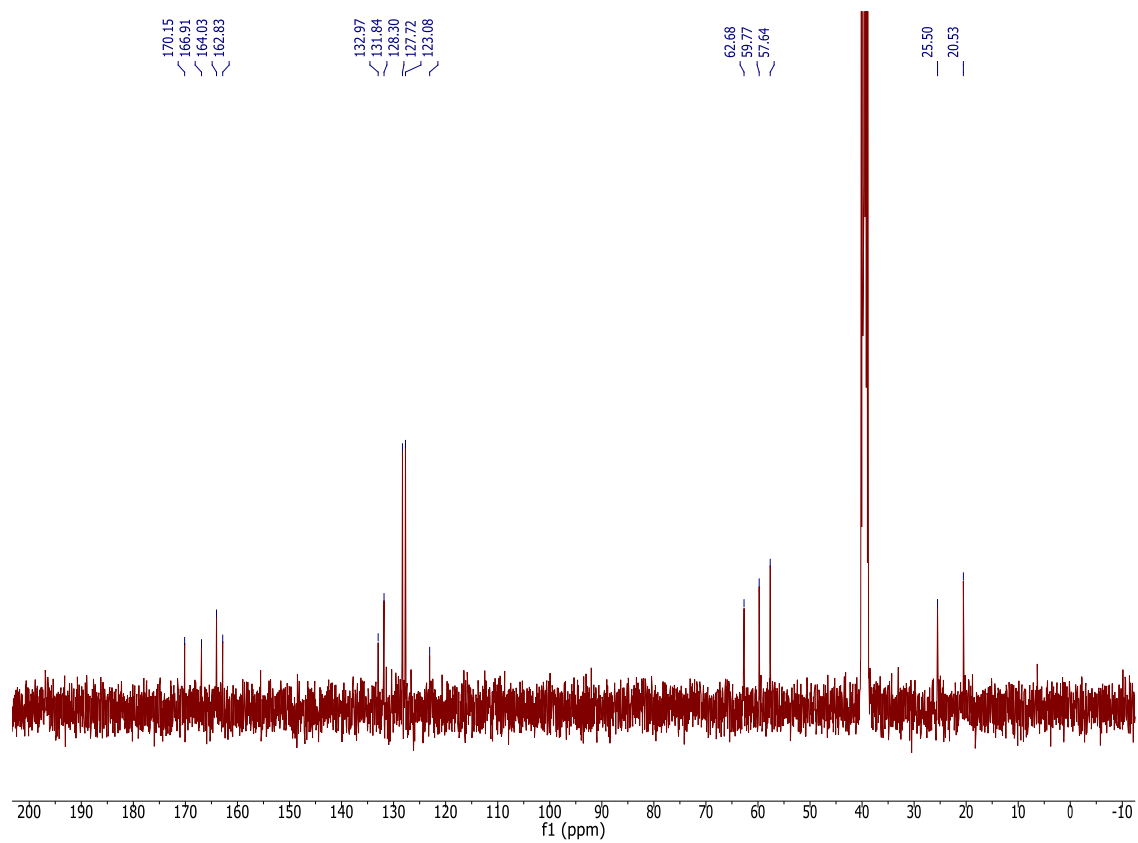

Compound **21** -  $^1\text{H}$  NMR (DMSO- $d_6$ , 400 MHz) and  $^{13}\text{C}$  NMR (DMSO- $d_6$ , 101 MHz)

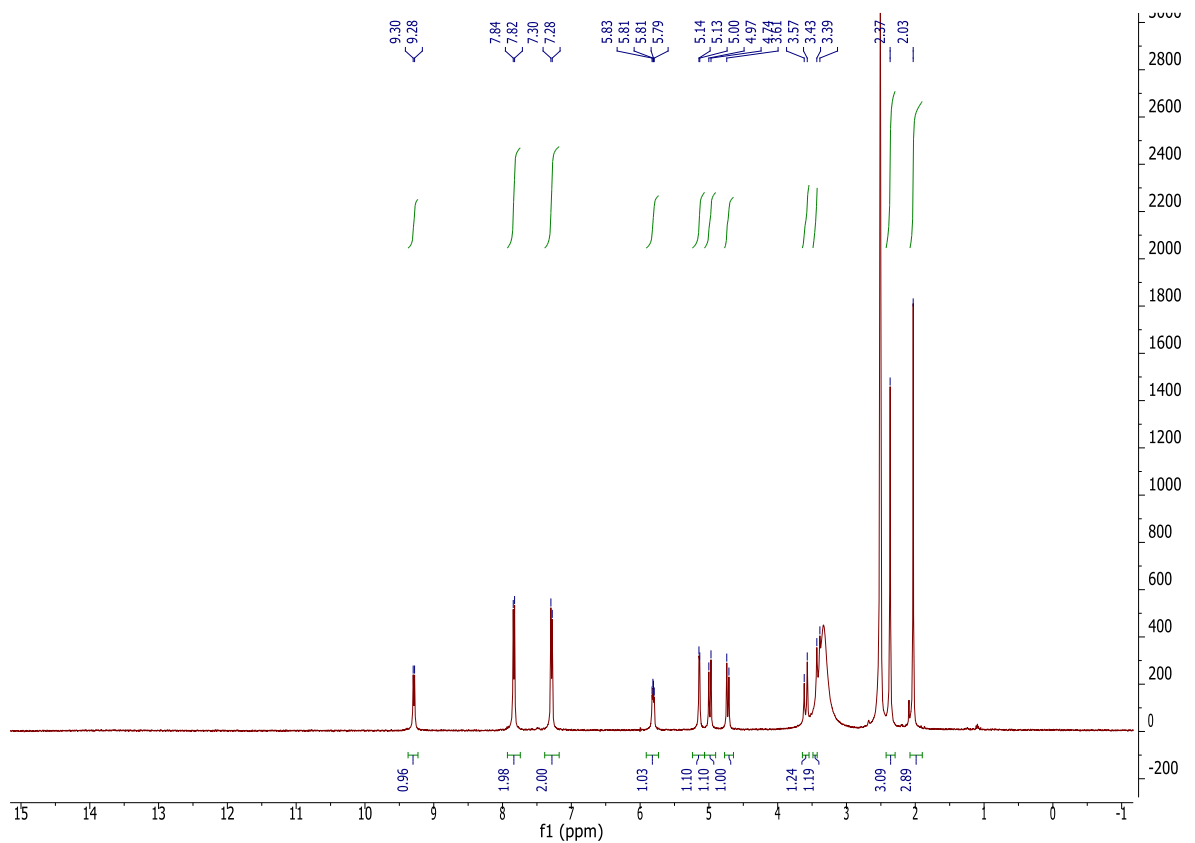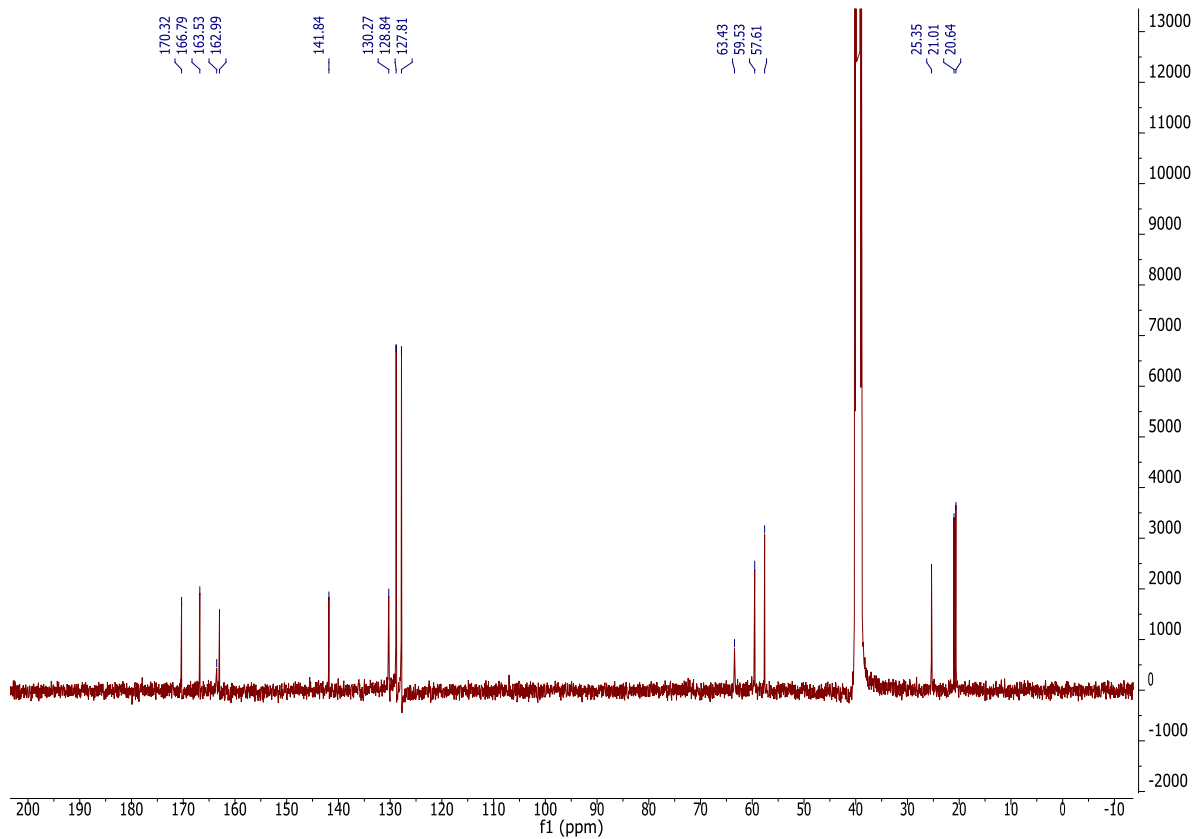

Compound **22** -  $^1\text{H}$  NMR (DMSO- $d_6$ , 400 MHz) and  $^{13}\text{C}$  NMR (DMSO- $d_6$ , 101 MHz)

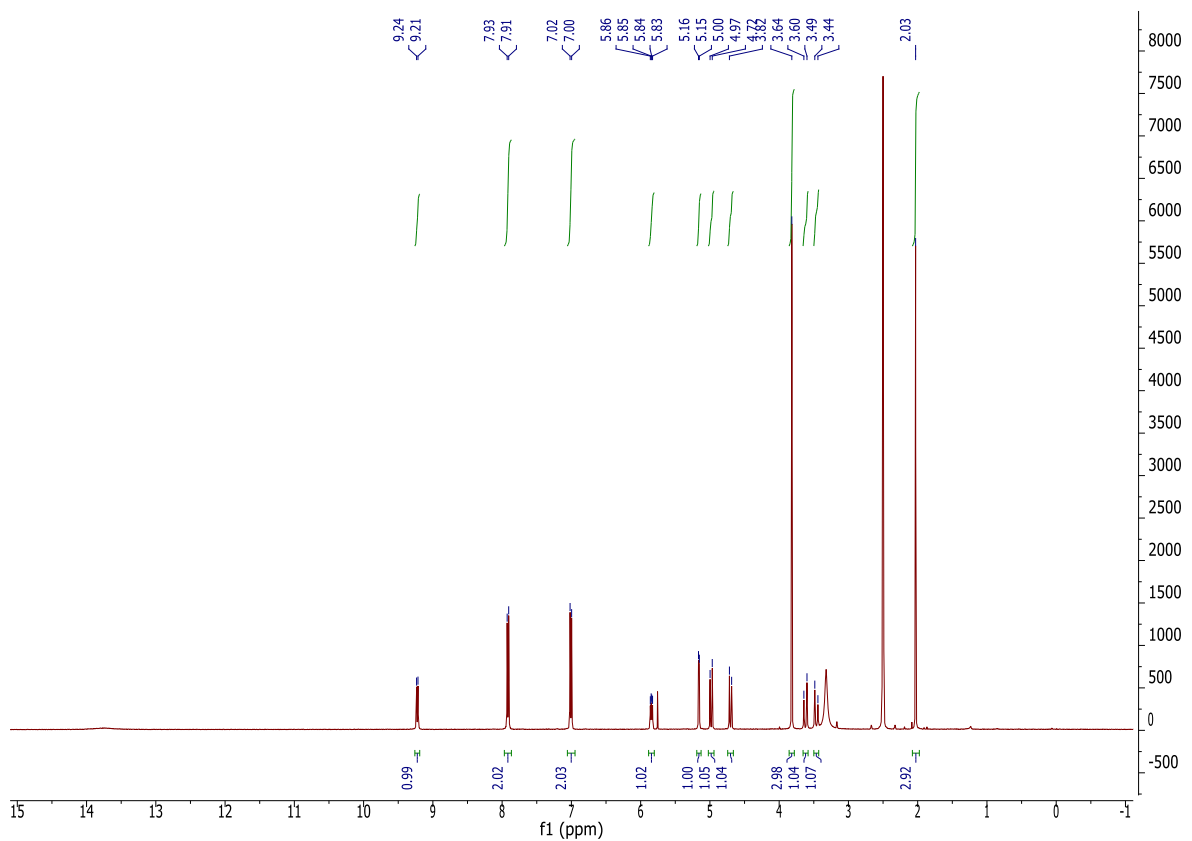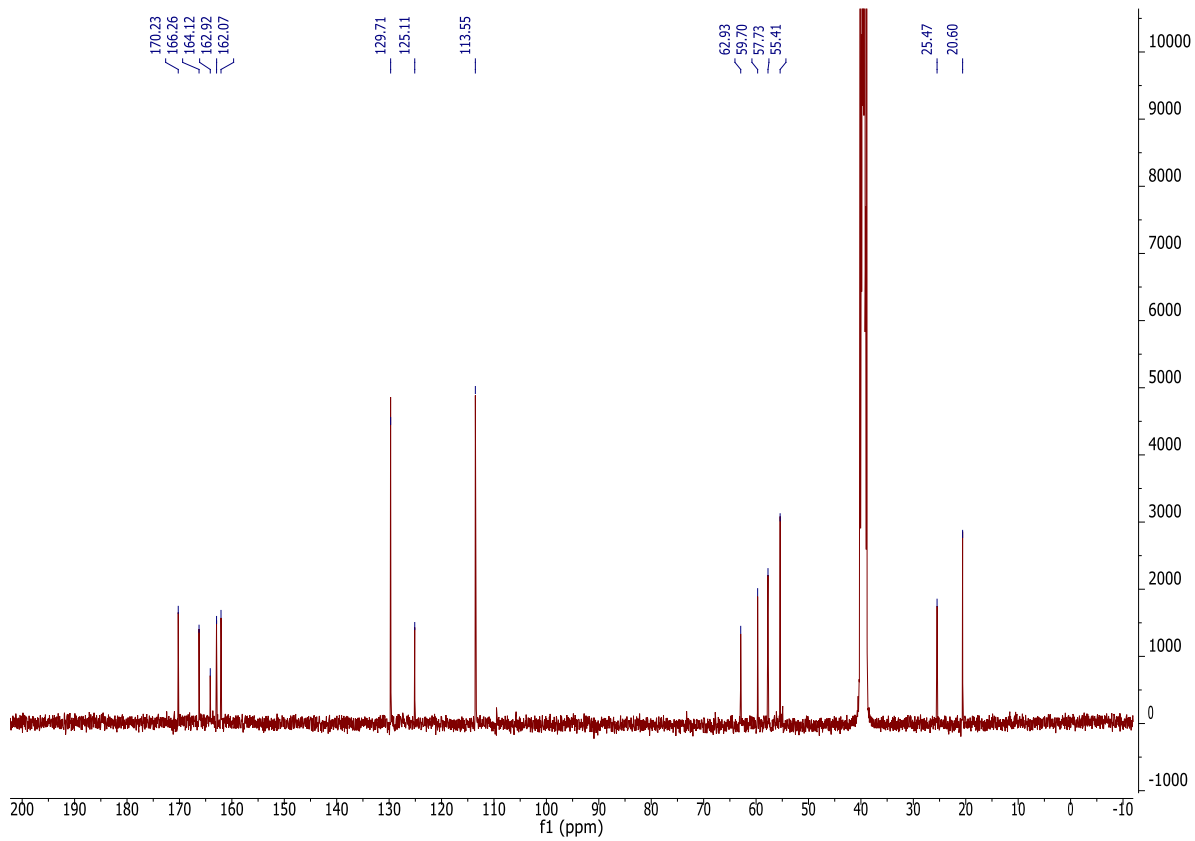



Compound **23** -  $^1\text{H}$  NMR (DMSO- $d_6$ , 400 MHz) and  $^{13}\text{C}$  NMR (DMSO- $d_6$ , 101 MHz)

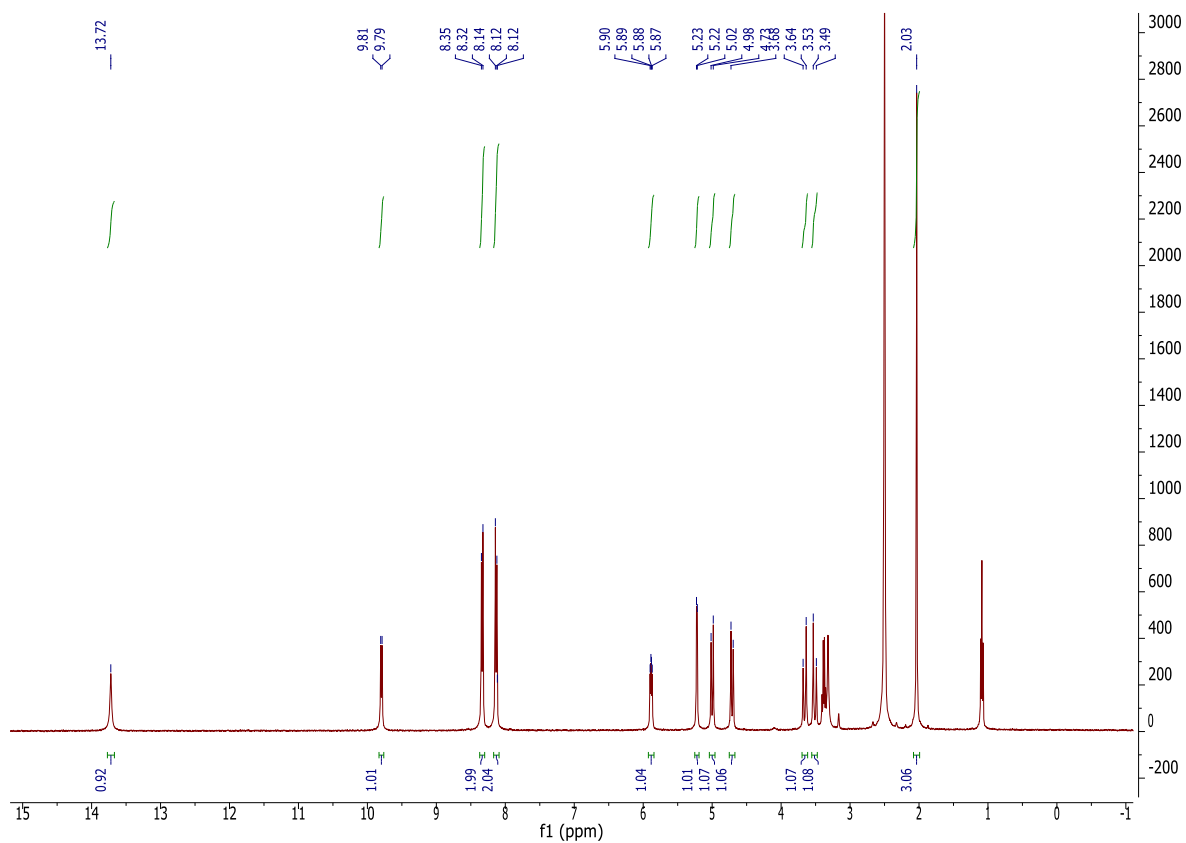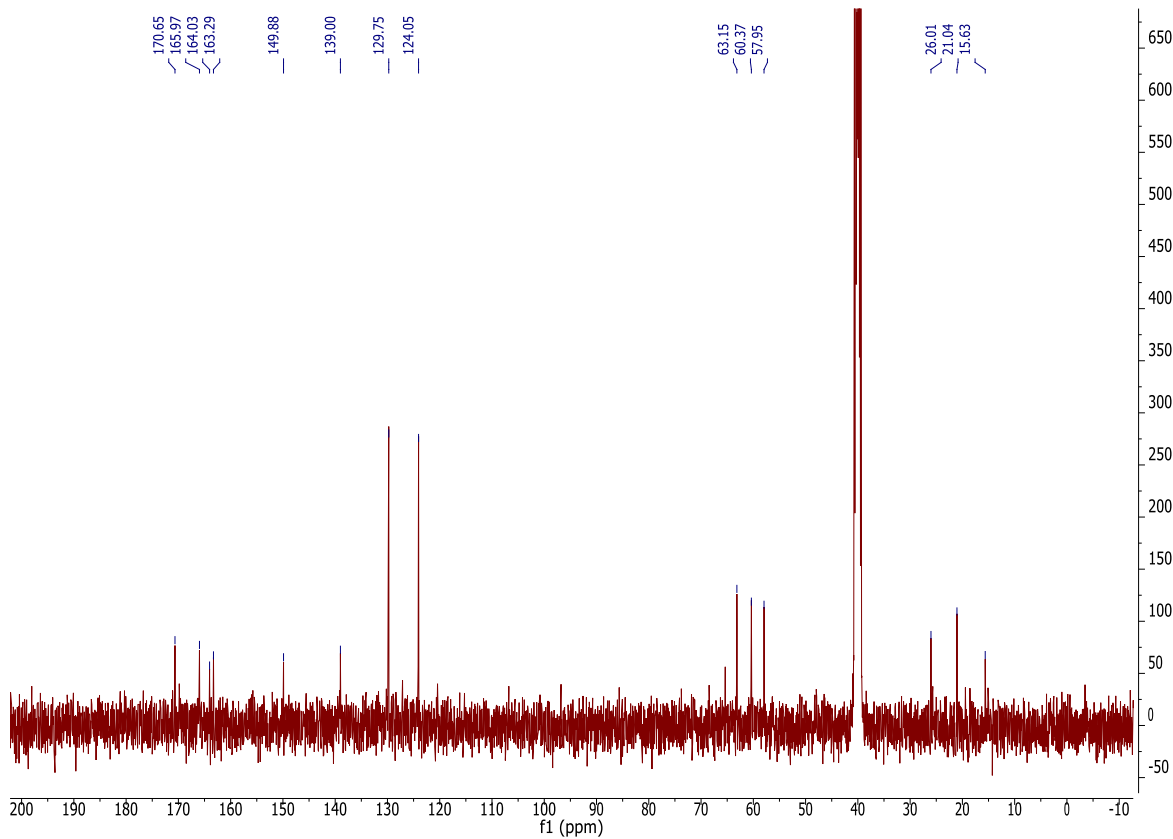

Compound 24 -  $^1\text{H}$  NMR (DMSO- $d_6$ , 400 MHz) and  $^{13}\text{C}$  NMR (DMSO- $d_6$ , 101 MHz)

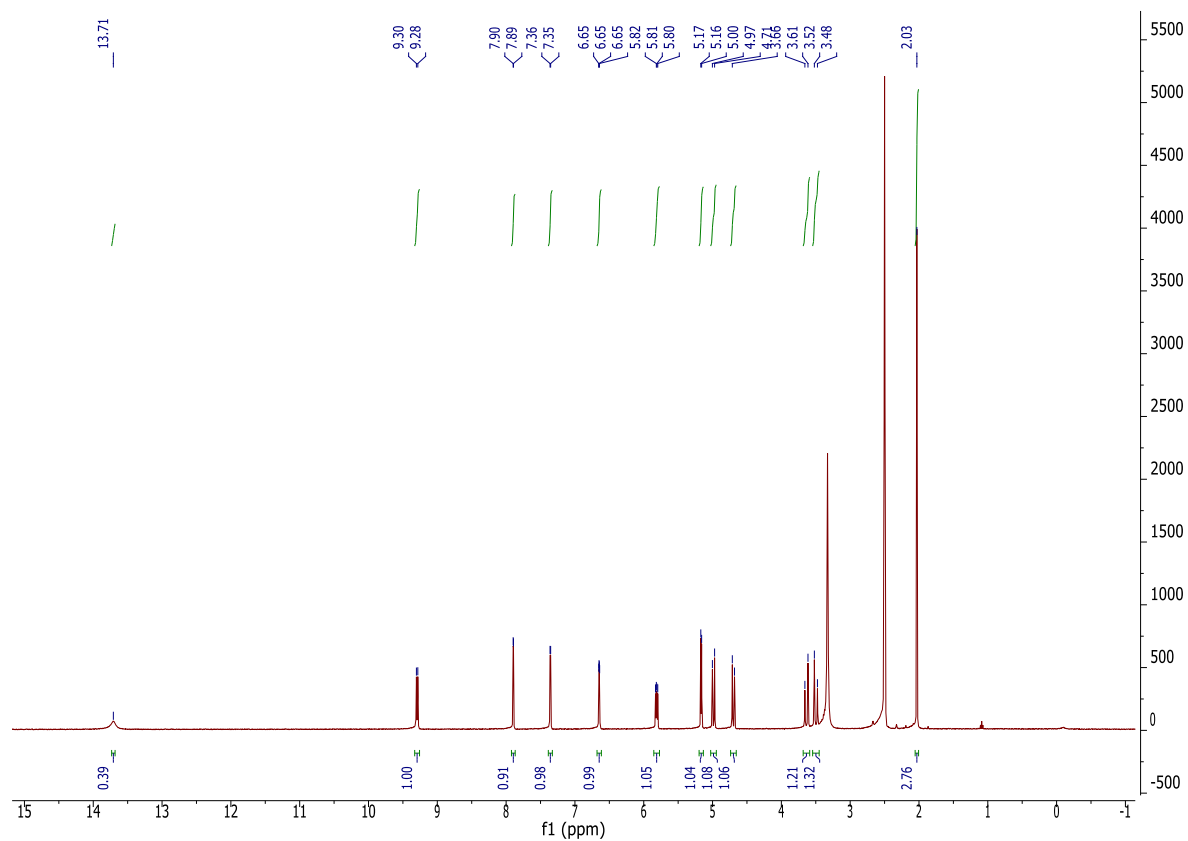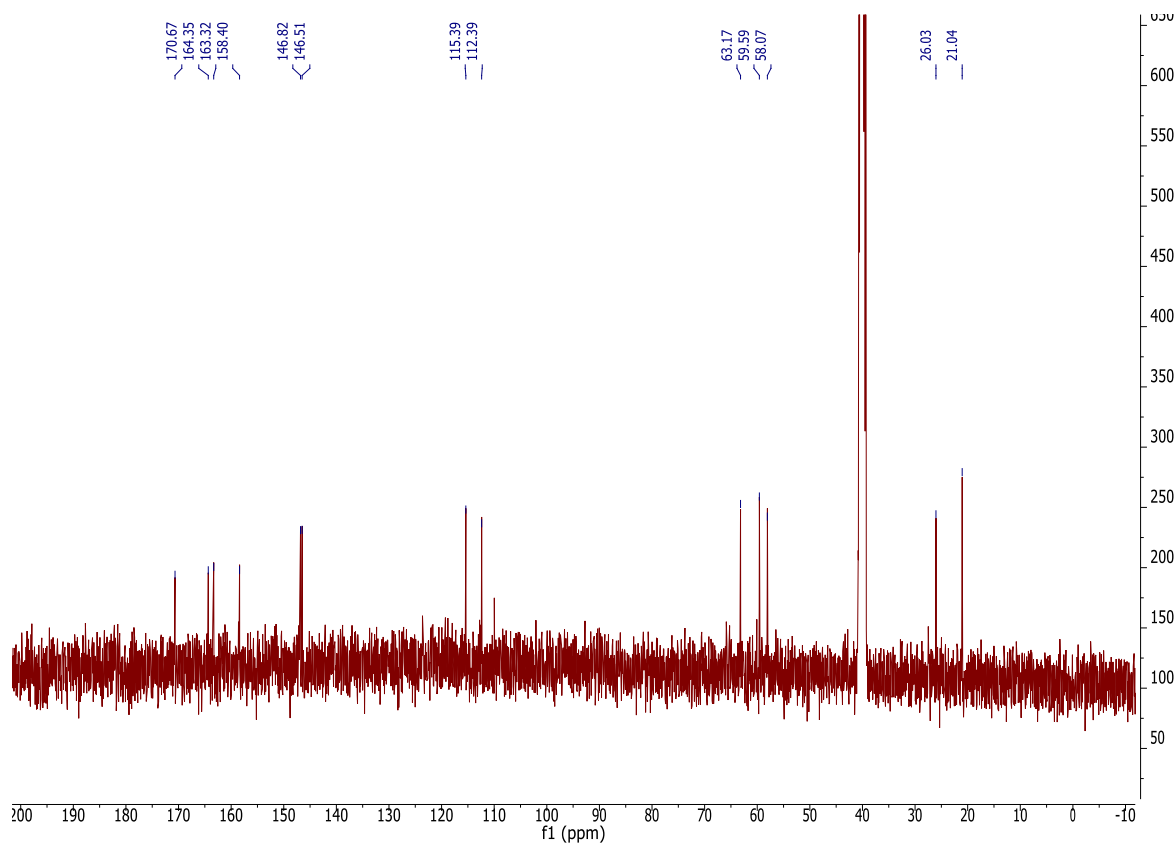

Compound 25 -  $^1\text{H}$  NMR (DMSO- $d_6$ , 400 MHz) and  $^{13}\text{C}$  NMR (DMSO- $d_6$ , 101 MHz)

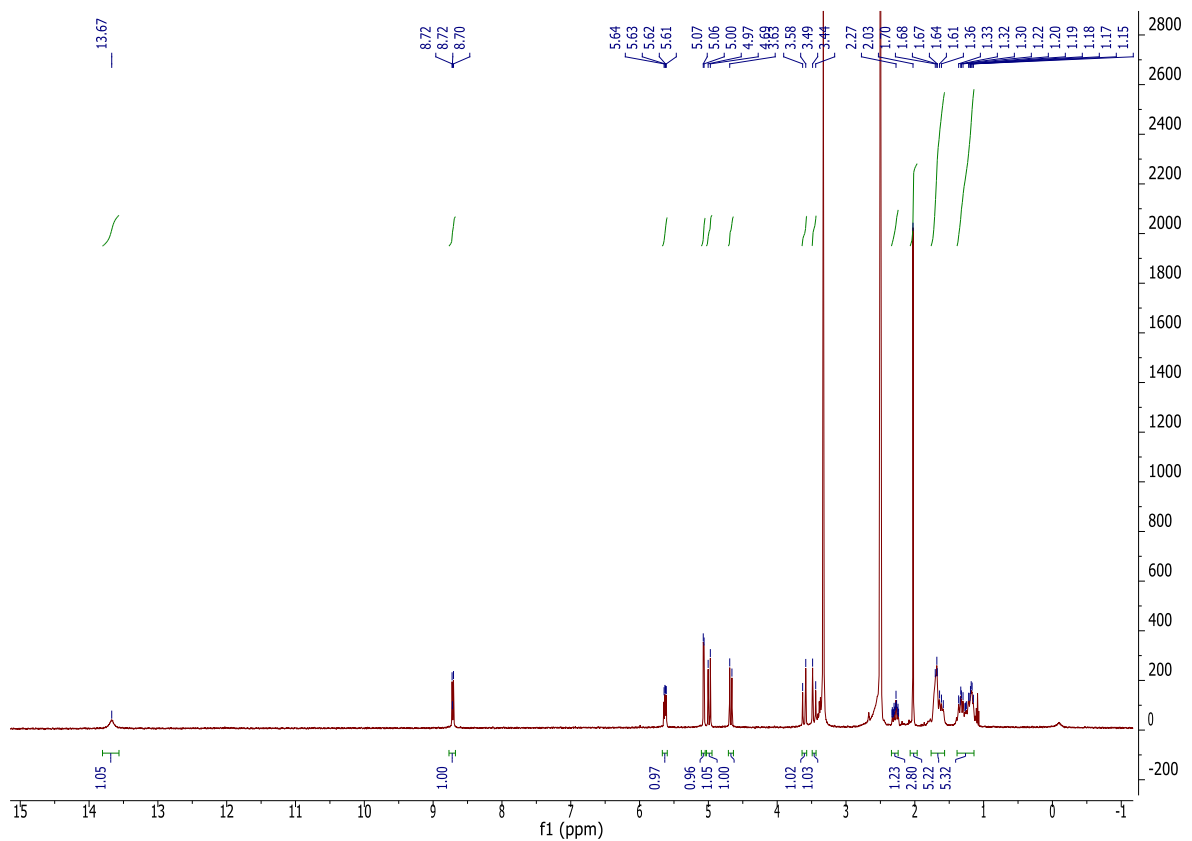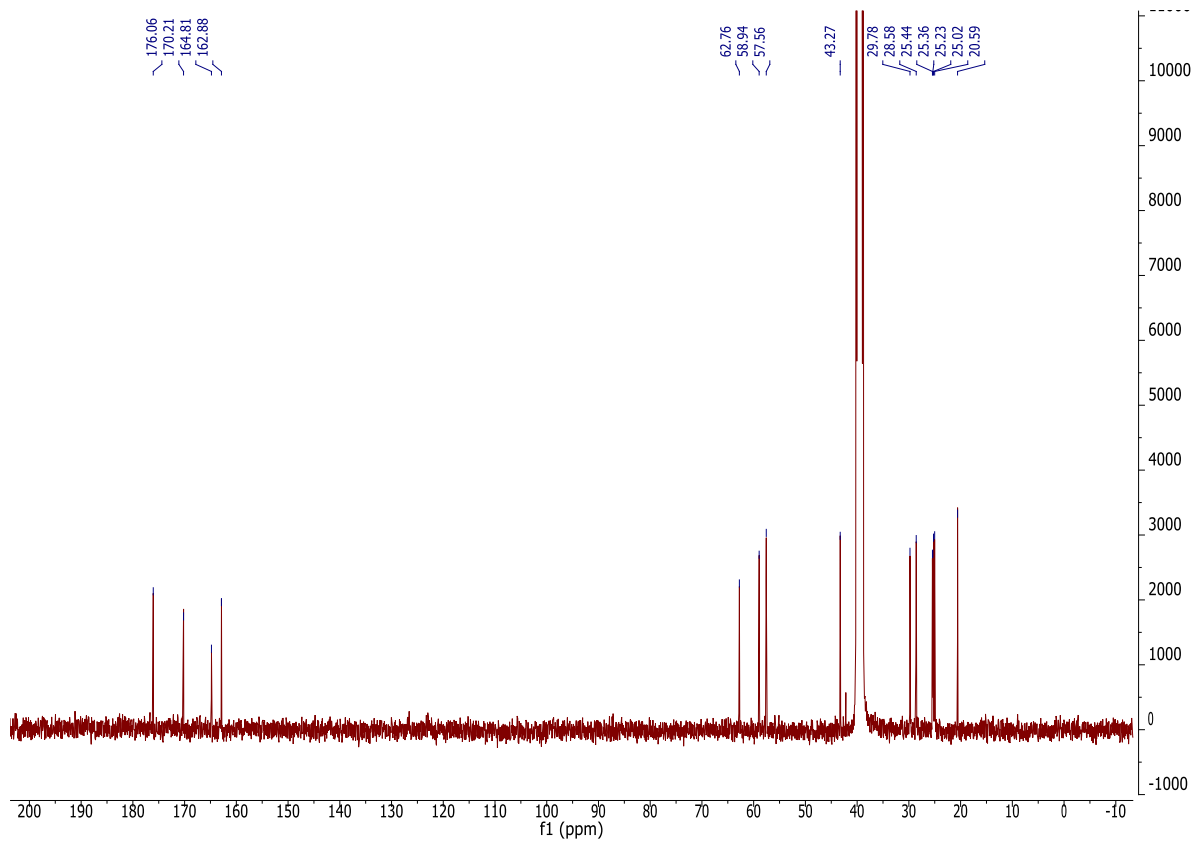

Compound **26** -  $^1\text{H}$  NMR (DMSO- $d_6$ , 400 MHz) and  $^{13}\text{C}$  NMR (DMSO- $d_6$ , 101 MHz)

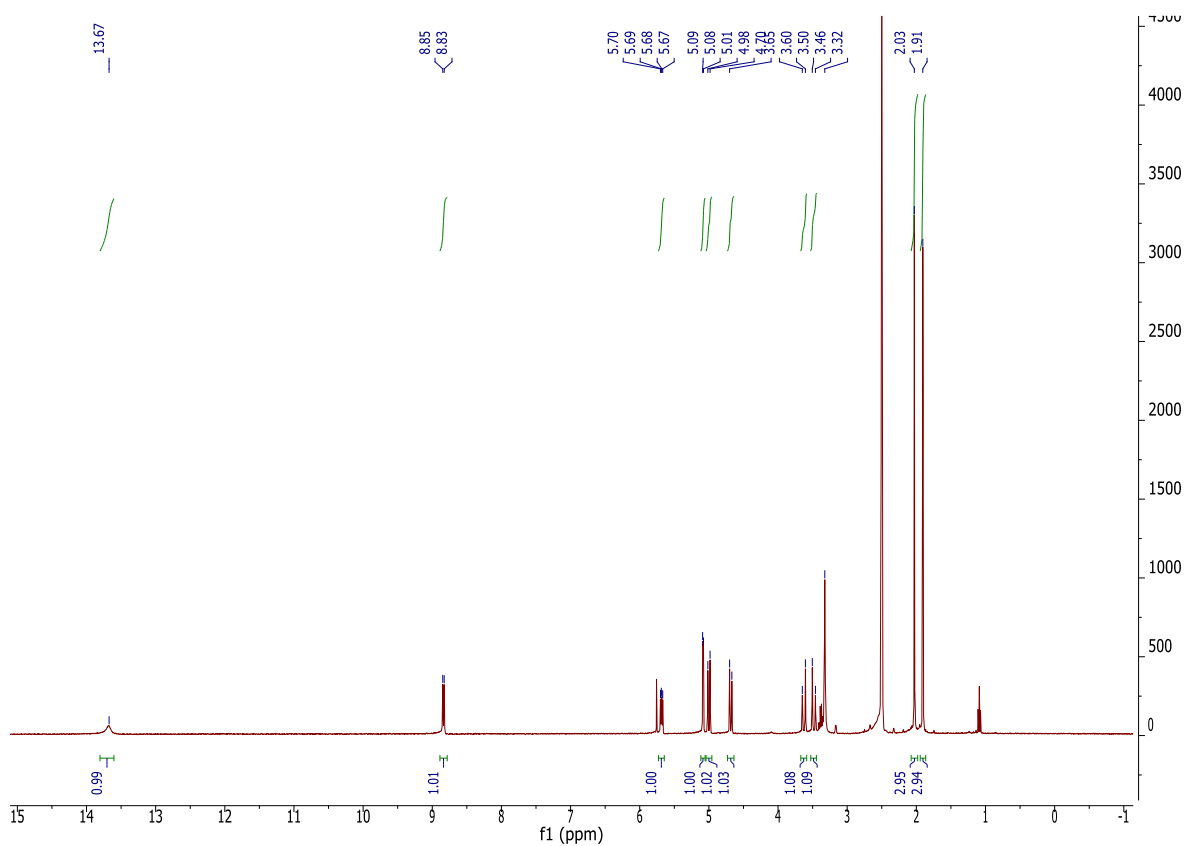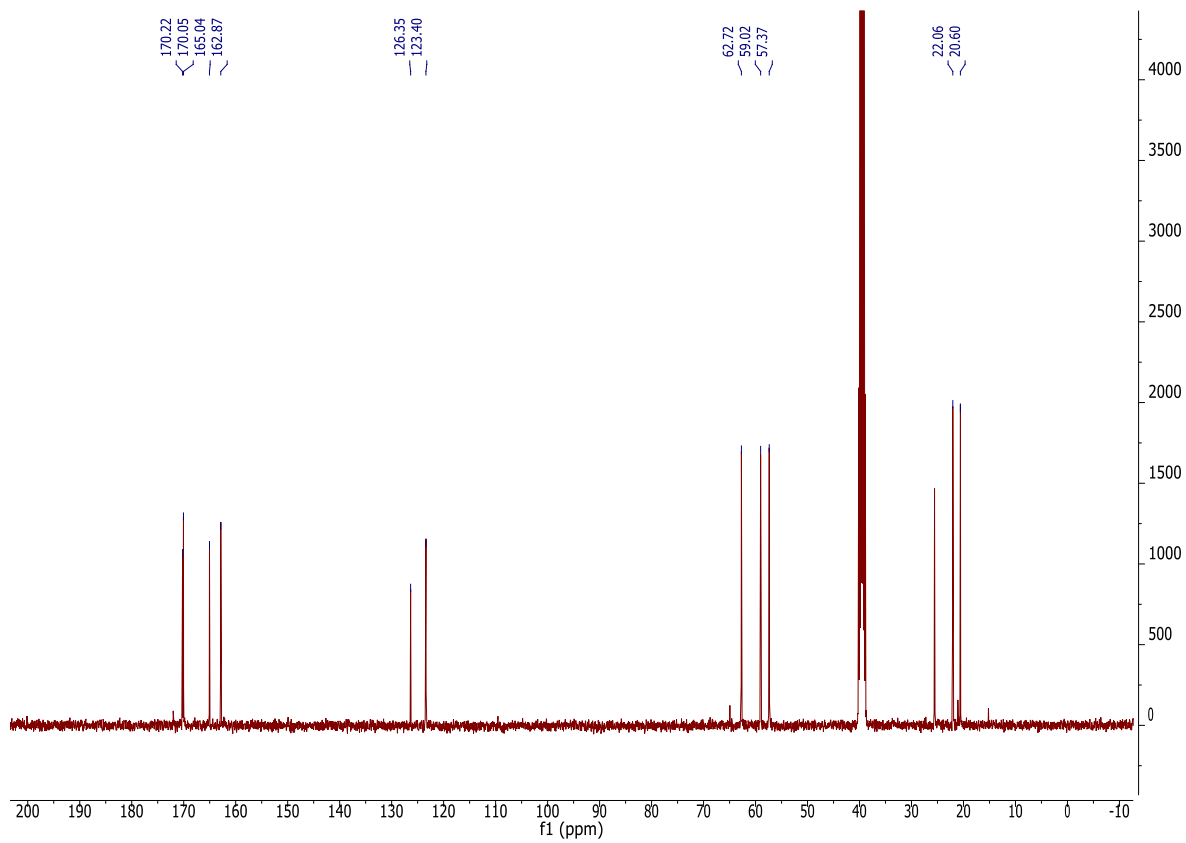

Compound 27 -  $^1\text{H}$  NMR (DMSO- $d_6$ , 400 MHz) and  $^{13}\text{C}$  NMR (DMSO- $d_6$ , 101 MHz)

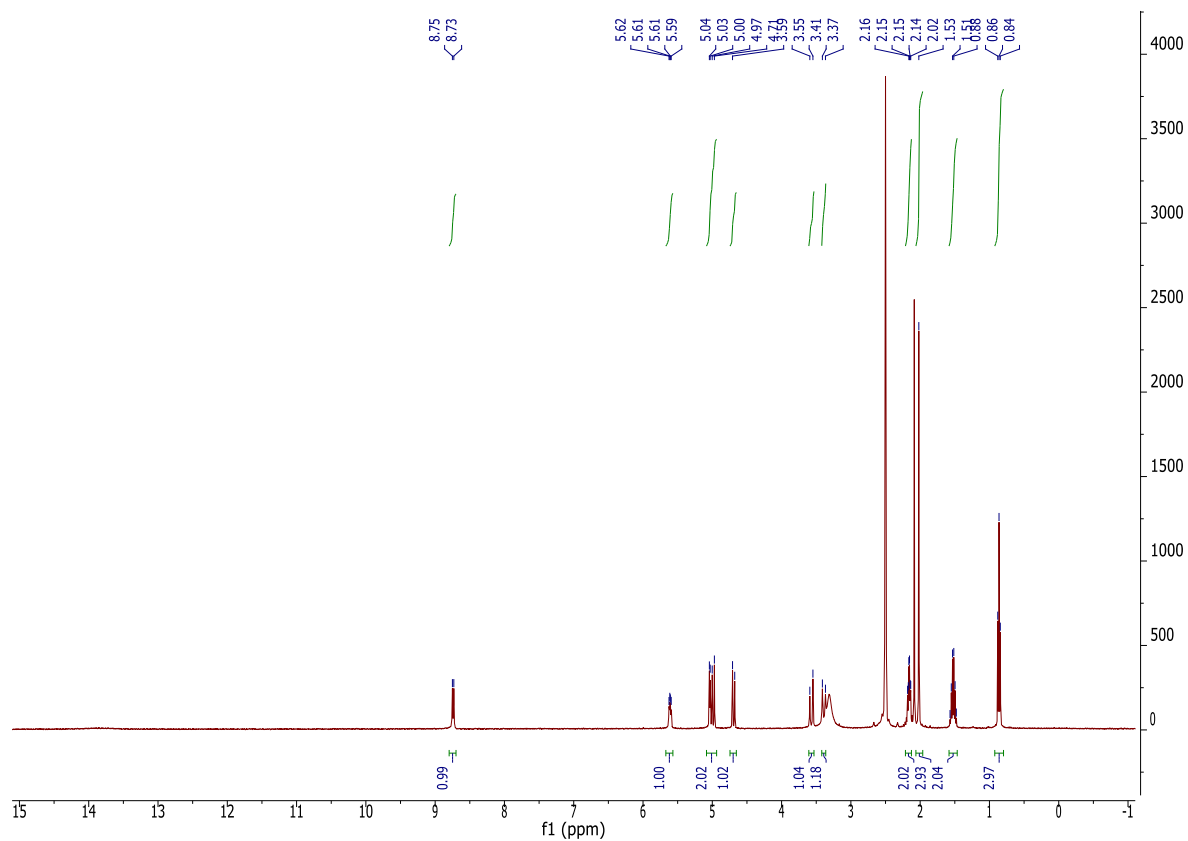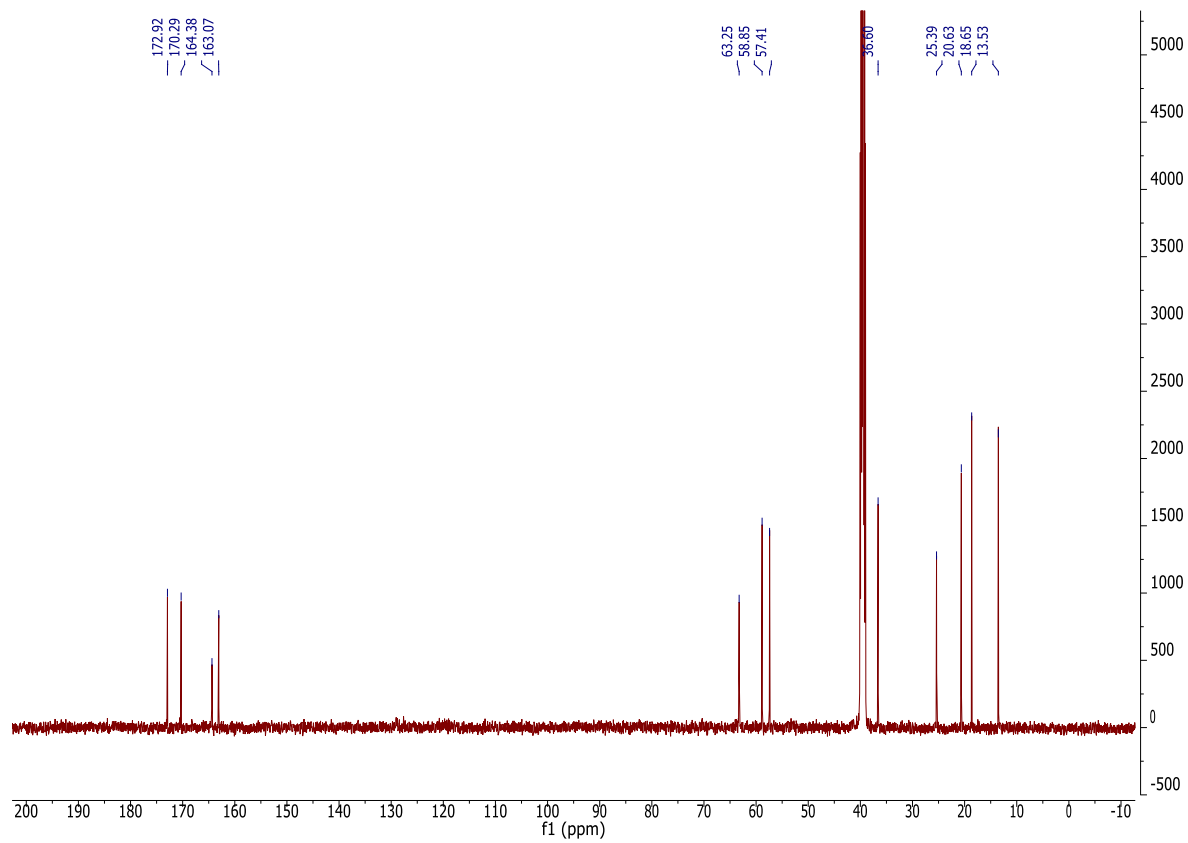



Compound **29** -  $^1\text{H}$  NMR ( $\text{CDCl}_3$ , 400 MHz) and  $^{13}\text{C}$  NMR ( $\text{CDCl}_3$ , 101 MHz)

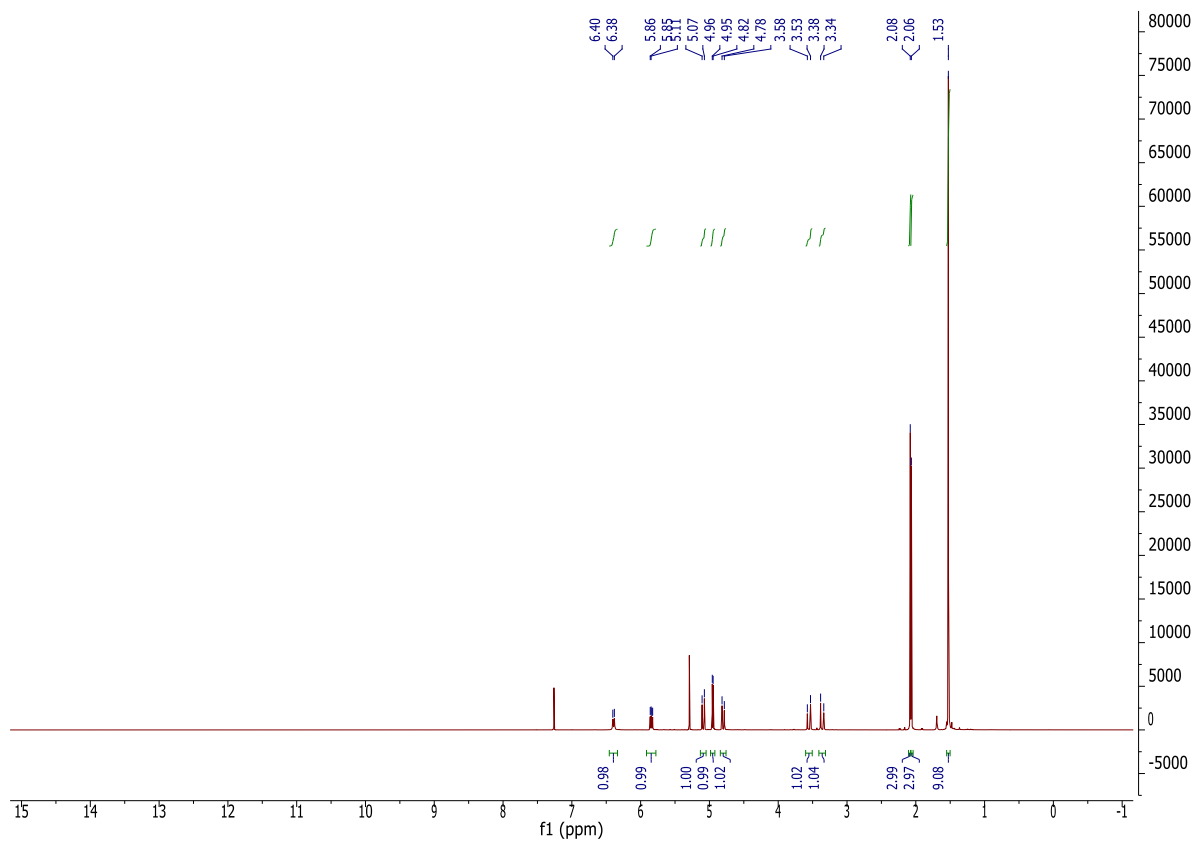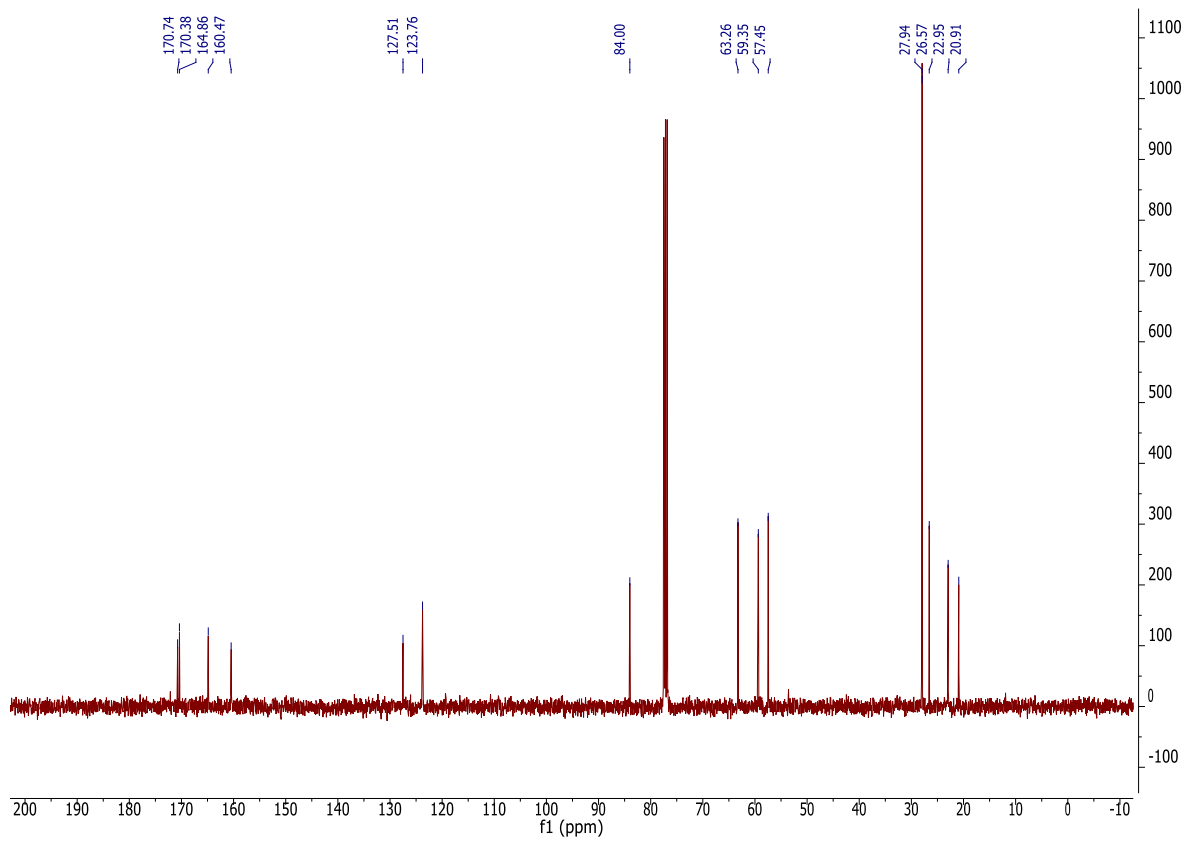

Compound **32** -  $^1\text{H}$  NMR ( $\text{CDCl}_3$ , 400 MHz) and  $^{13}\text{C}$  NMR ( $\text{CDCl}_3$ , 101 MHz)

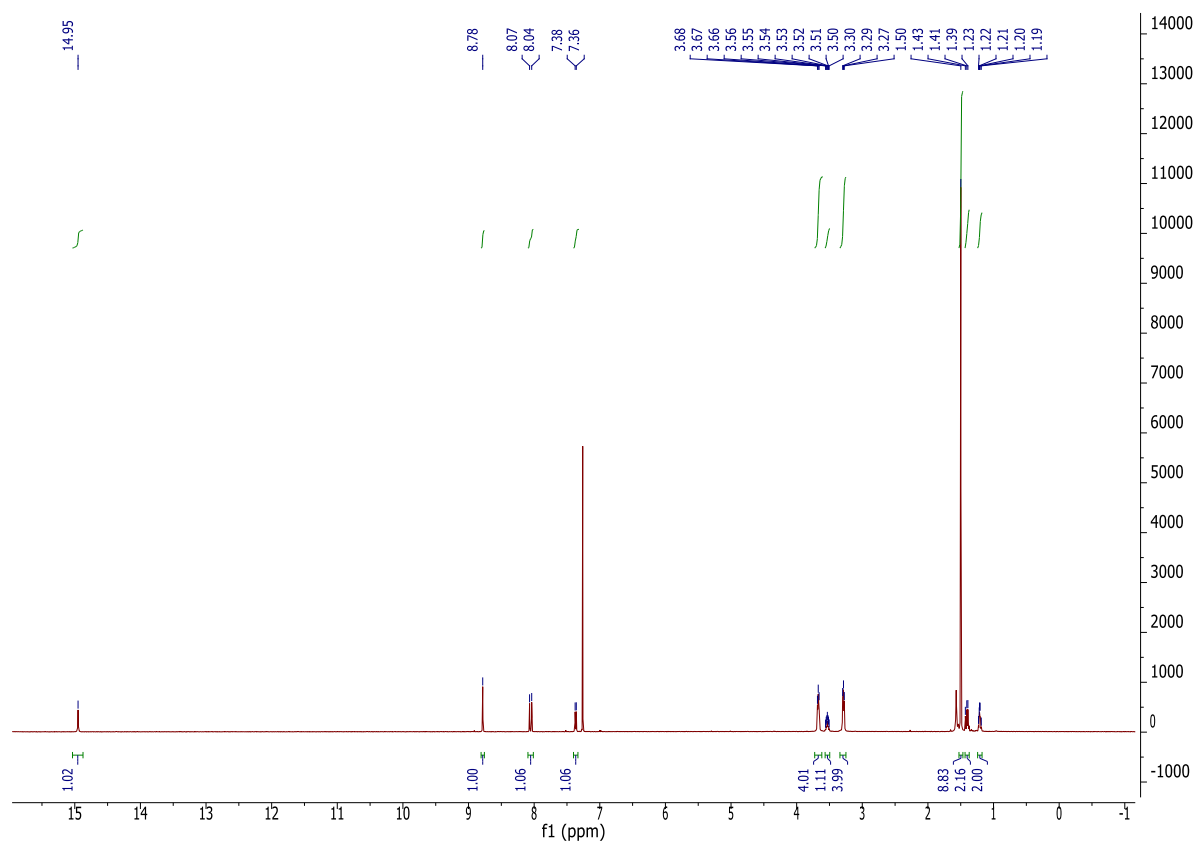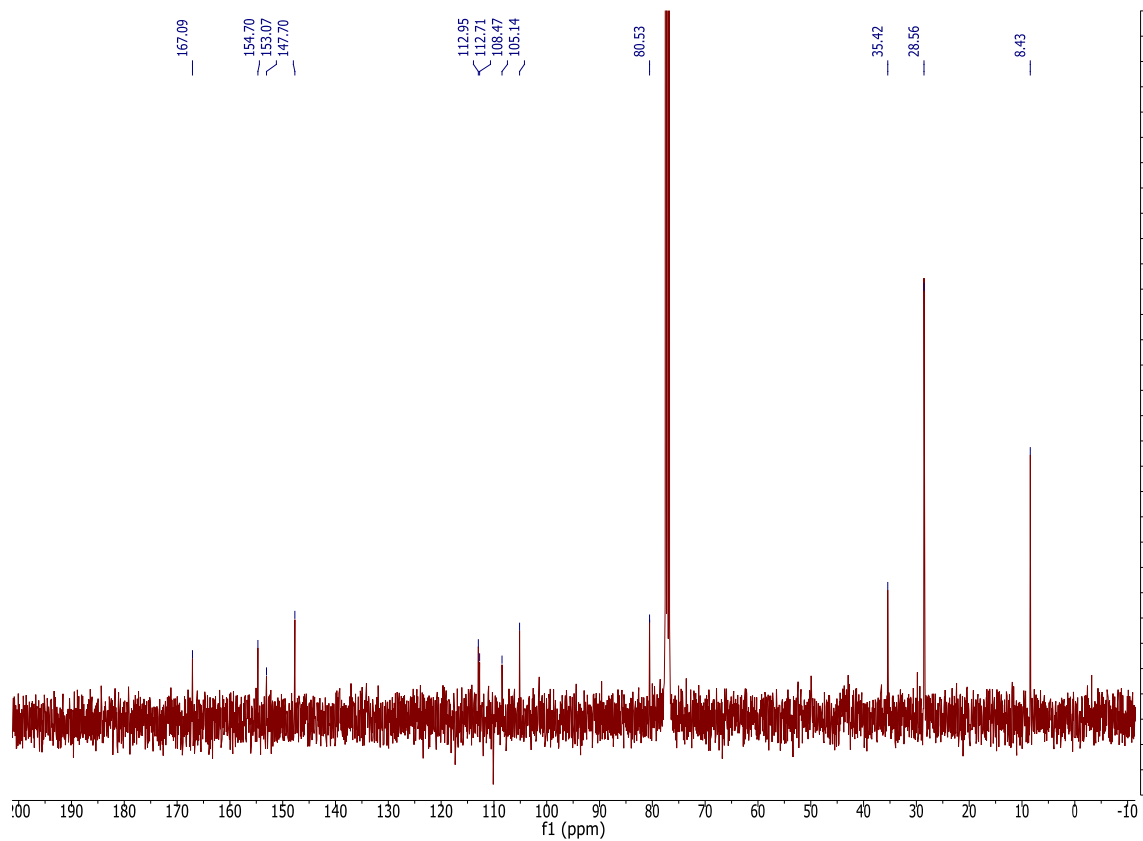



Compound **34** -  $^1\text{H}$  NMR (DMSO- $d_6$ , 400 MHz) and  $^{13}\text{C}$  NMR (DMSO- $d_6$ , 101 MHz)

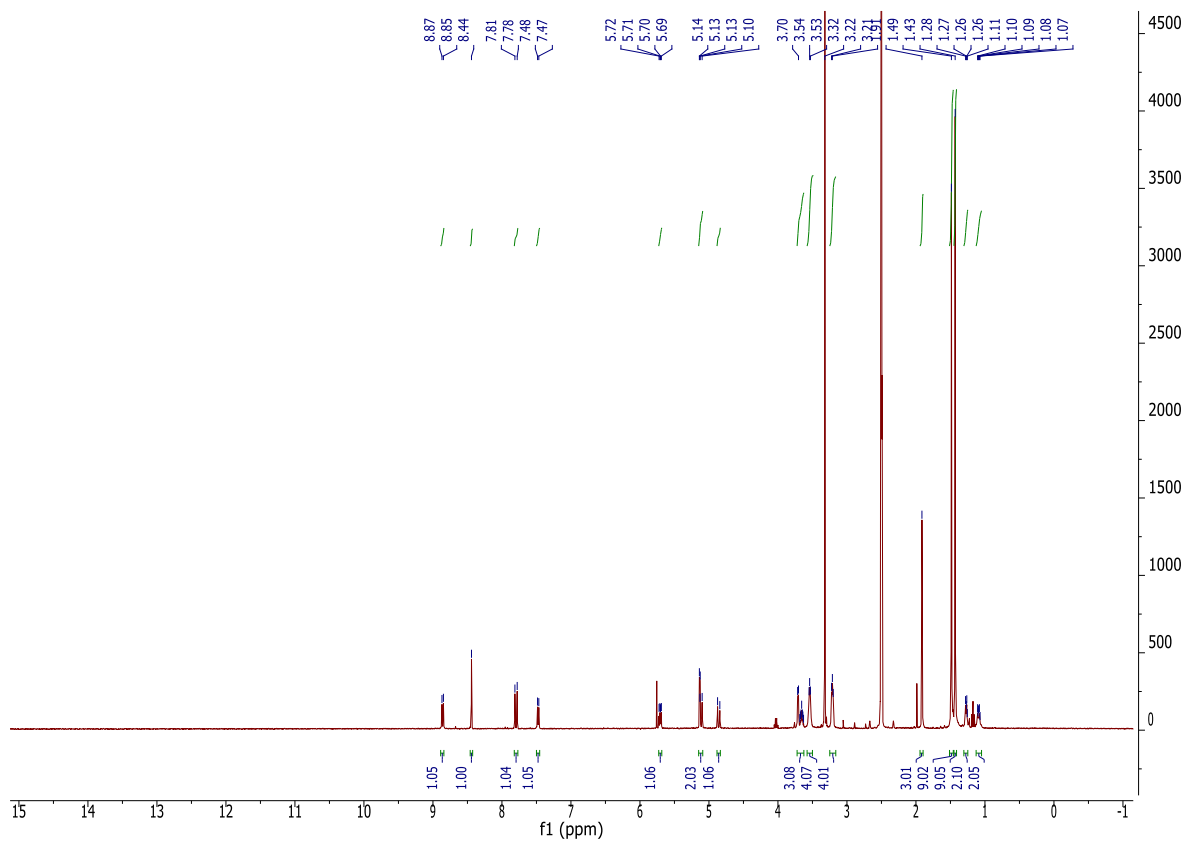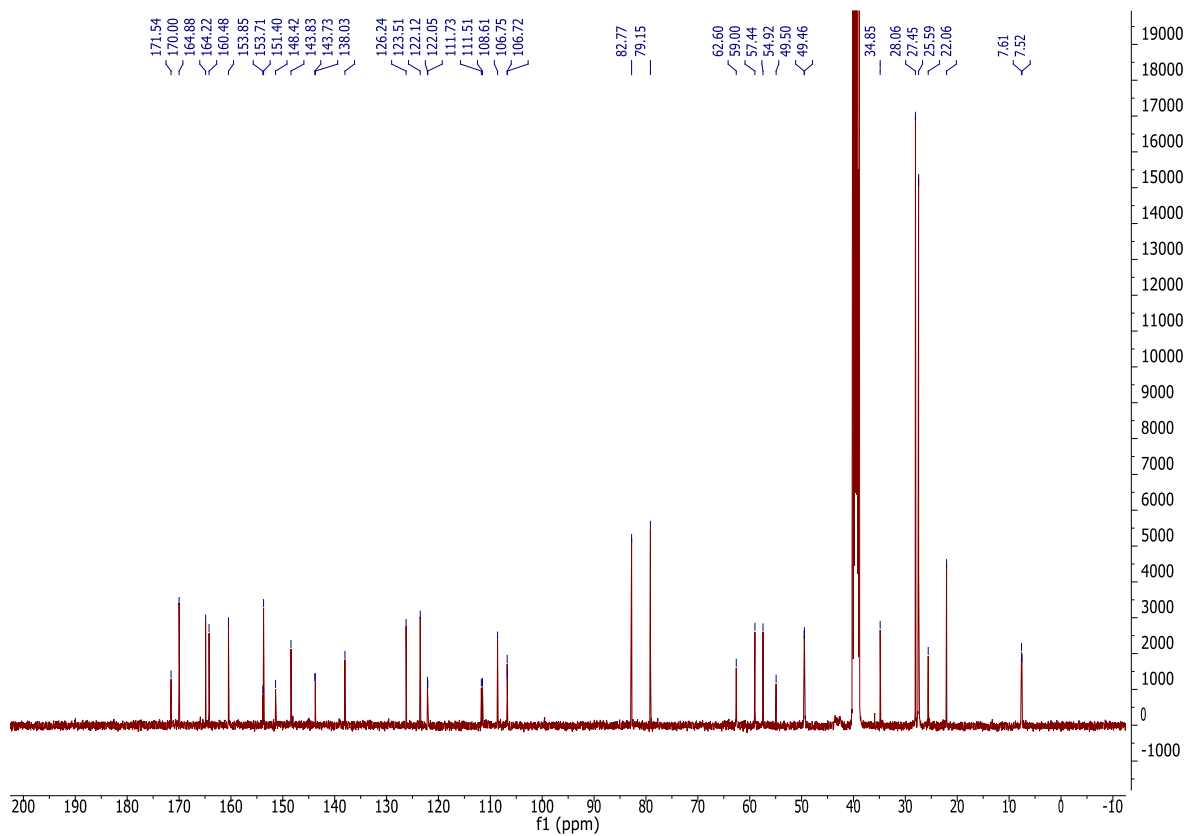

Compound 35 -  $^1\text{H}$  NMR ( $\text{D}_2\text{O}$ , 400 MHz) and LCMS UV trace

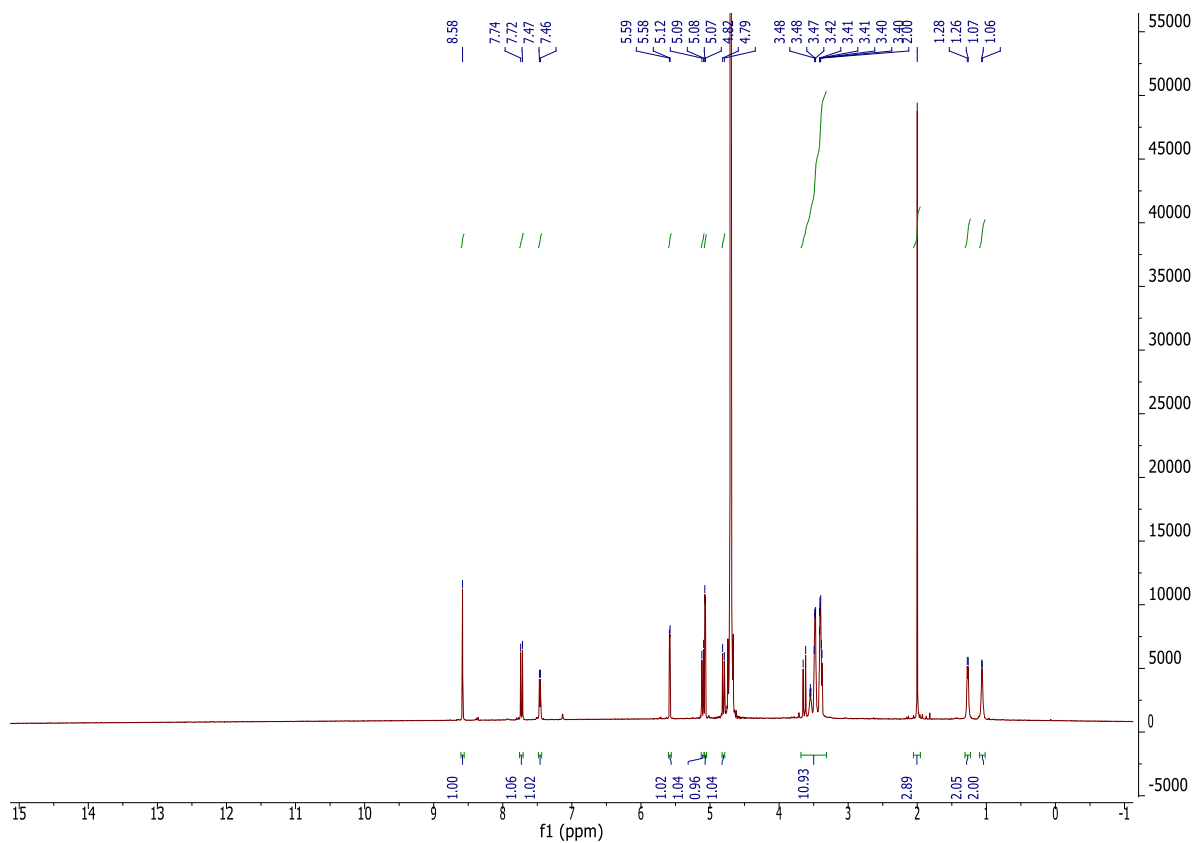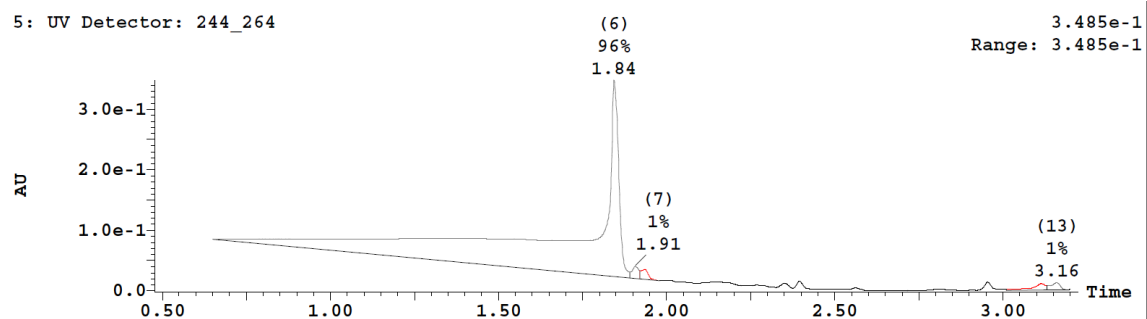

- (1) Buckwell, S. C.; Page, M. I.; Waley, S. G.; Longridge, J. L. Hydrolysis of 7-Substituted Cephalosporins Catalysed by  $\beta$ -Lactamases I and II from *Bacillus Cereus* and by Hydroxide Ion. *J. Chem. Soc., Perkin Trans. 2* 1988, 0 (10), 1815–1821.
- (2) Rao, W.-H.; Zhan, B.-B.; Chen, K.; Ling, P.-X.; Zhang, Z.-Z.; Shi, B.-F. Pd(II)-Catalyzed Direct Sulfonylation of Unactivated C(Sp<sup>3</sup>)–H Bonds with Sodium Sulfinates. *Org. Lett.* 2015, 17 (14), 3552–3555.
- (3) Cahill, S. T.; Cain, R.; Wang, D. Y.; Lohans, C. T.; Wareham, D. W.; Oswin, H. P.; Mohammed, J.; Spencer, J.; Fishwick, C. W. G.; McDonough, M. A.; et al. Cyclic Boronates Inhibit All Classes of  $\beta$ -Lactamases. *Antimicrob. Agents Chemother.* 2017, 61 (4), e02260-16.
- (4) Mobley, H. L.; Green, D. M.; Trifillis, A. L.; Johnson, D. E.; Chippendale, G. R.; Lockatell, C. V.; Jones, B. D.; Warren, J. W. Pylonephritogenic *Escherichia Coli* and Killing of Cultured Human Renal Proximal Tubular Epithelial Cells: Role of Hemolysin in Some Strains. *Infect. Immun.* 1990, 58 (5), 1281–1289.
- (5) Bartolomé, B.; Jubete, Y.; Martínez, E.; de la Cruz, F. Construction and Properties of a Family of PACYC184-Derived Cloning Vectors Compatible with PBR322 and Its Derivatives. *Gene* 1991, 102 (1), 75–78.
- (6) Brem, J.; Cain, R.; Cahill, S.; McDonough, M. A.; Clifton, I. J.; Jiménez-Castellanos, J.-C.; Avison, M. B.; Spencer, J.; Fishwick, C. W. G.; Schofield, C. J. Structural Basis of Metallo- $\beta$ -Lactamase, Serine- $\beta$ -Lactamase and Penicillin-Binding Protein Inhibition by Cyclic Boronates. *Nat. Commun.* 2016, 7, 12406.
- (7) Jiménez-Castellanos, J.-C.; Wan Nur Ismah, W. A. K.; Takebayashi, Y.; Findlay, J.; Schneiders, T.; Heesom, K. J.; Avison, M. B. Envelope Proteome Changes Driven by RamA Overproduction in *Klebsiella Pneumoniae* That Enhance Acquired  $\beta$ -Lactam Resistance. *J. Antimicrob. Chemother.* 2018, 73 (1), 88–94.
- (8) Sambrook, J.; Russell, D. W. *Molecular Cloning a Laboratory Manual*, 3rd ed.; Cold Spring Harbor Laboratory Press, 2001.
- (9) Wiegand, I.; Hilpert, K.; Hancock, R. E. W. Agar and Broth Dilution Methods to Determine the Minimal Inhibitory Concentration (MIC) of Antimicrobial Substances. *Nat. Protoc.* 2008, 3 (2), 163–

175.

- (10) Hwang, T. L.; Shaka, A. J. Water Suppression That Works. Excitation Sculpting Using Arbitrary Wave-Forms and Pulsed-Field Gradients. *J. Magn. Reson. Ser. A* **1995**, *112* (2), 275–279.
